# Supplementary material for: AI-driven preclinical disease risk assessment using imaging in UK biobank
Source: NPJ Digit Med. 2025 Jul 26;8:480. doi: 10.1038/s41746-025-01771-3 (PMC12297167; doi:10.1038/s41746-025-01771-3)
Supplement: Supplementary file 2 — Supplementary Data 1 [file 41746_2025_1771_MOESM2_ESM.xlsx]

## Sheet: Tabular Feature Description
Tabular Feature Description
Feature Name	Encoding Type	Field ID/Source
Cardiac Features
LVESV (mL)	numeric	Derived from Cardiac MRI
RAV max (mL)	numeric	Derived from Cardiac MRI
RVEDV (mL)	numeric	Derived from Cardiac MRI
WT_AHA_1 (mm)	numeric	Derived from Cardiac MRI
RVSV (mL)	numeric	Derived from Cardiac MRI
WT_AHA_12 (mm)	numeric	Derived from Cardiac MRI
WT_AHA_15 (mm)	numeric	Derived from Cardiac MRI
WT_Global (mm)	numeric	Derived from Cardiac MRI
WT_AHA_14 (mm)	numeric	Derived from Cardiac MRI
WT_AHA_5 (mm)	numeric	Derived from Cardiac MRI
WT_AHA_10 (mm)	numeric	Derived from Cardiac MRI
LVM (g)	numeric	Derived from Cardiac MRI
RVESV (mL)	numeric	Derived from Cardiac MRI
WT_AHA_13 (mm)	numeric	Derived from Cardiac MRI
WT_AHA_4 (mm)	numeric	Derived from Cardiac MRI
LASV (mL)	numeric	Derived from Cardiac MRI
RAV min (mL)	numeric	Derived from Cardiac MRI
WT_AHA_7 (mm)	numeric	Derived from Cardiac MRI
WT_AHA_6 (mm)	numeric	Derived from Cardiac MRI
WT_AHA_9 (mm)	numeric	Derived from Cardiac MRI
WT_AHA_2 (mm)	numeric	Derived from Cardiac MRI
LVCO (L/min)	numeric	Derived from Cardiac MRI
WT_AHA_8 (mm)	numeric	Derived from Cardiac MRI
RVEF (%)	numeric	Derived from Cardiac MRI
WT_AHA_11 (mm)	numeric	Derived from Cardiac MRI
LAV max (mL)	numeric	Derived from Cardiac MRI
RAEF (%)	numeric	Derived from Cardiac MRI
WT_AHA_16 (mm)	numeric	Derived from Cardiac MRI
WT_AHA_3 (mm)	numeric	Derived from Cardiac MRI
LAEF (%)	numeric	Derived from Cardiac MRI
LVSV (mL)	numeric	Derived from Cardiac MRI
RASV (mL)	numeric	Derived from Cardiac MRI
LVEF (%)	numeric	Derived from Cardiac MRI
LAV min (mL)	numeric	Derived from Cardiac MRI
LVEDV (mL)	numeric	Derived from Cardiac MRI
Clinical Features
Waist circumference	numeric	48
Systolic blood pressure, automated reading	numeric	4080
Diastolic blood pressure, automated reading	numeric	4079
Forced expiratory volume in 1-second (FEV1)	numeric	3063
Disease History
Congestive heart failure	one-hot	Derived from 41270 and 41280
Cardiac arrhythmias	one-hot	Derived from 41270 and 41280
Valvular disease	one-hot	Derived from 41270 and 41280
Pulmonary circulation disorders	one-hot	Derived from 41270 and 41280
Peripheral vascular disorders	one-hot	Derived from 41270 and 41280
Hypertension, uncomplicated	one-hot	Derived from 41270 and 41280
Hypertension, complicated	one-hot	Derived from 41270 and 41280
Paralysis	one-hot	Derived from 41270 and 41280
Other neurological disorders	one-hot	Derived from 41270 and 41280
Chronic pulmonary disease	one-hot	Derived from 41270 and 41280
Diabetes, uncomplicated	one-hot	Derived from 41270 and 41280
Diabetes, complicated	one-hot	Derived from 41270 and 41280
Hypothyroidism	one-hot	Derived from 41270 and 41280
Renal failure	one-hot	Derived from 41270 and 41280
Liver disease	one-hot	Derived from 41270 and 41280
Peptic ulcer disease excluding bleeding	one-hot	Derived from 41270 and 41280
AIDS/HIV	one-hot	Derived from 41270 and 41280
Lymphoma	one-hot	Derived from 41270 and 41280
Metastatic cancer	one-hot	Derived from 41270 and 41280
Solid tumor without metastasis	one-hot	Derived from 41270 and 41280
Rheumatoid arthritis/collagen vascular diseases	one-hot	Derived from 41270 and 41280
Coagulopathy	one-hot	Derived from 41270 and 41280
Obesity	one-hot	Derived from 41270 and 41280
Weight loss	one-hot	Derived from 41270 and 41280
Fluid and electrolyte disorders	one-hot	Derived from 41270 and 41280
Blood loss anemia	one-hot	Derived from 41270 and 41280
Deficiency anemia	one-hot	Derived from 41270 and 41280
Alcohol abuse	one-hot	Derived from 41270 and 41280
Drug abuse	one-hot	Derived from 41270 and 41280
Psychoses	one-hot	Derived from 41270 and 41280
Depression	one-hot	Derived from 41270 and 41280
Basic Features
Sex	binary	31
Ethnic background	one-hot	21000
Age when attended assessment centre	numeric	21003
Body Mass Index	numeric	21001
Physical Activity
Above moderate/vigorous recommendation	one-hot	22035
Above moderate/vigorous/walking recommendation	one-hot	22036
IPAQ activity group	ordinal	22032
MET minutes per week for moderate activity	numeric	22038
MET minutes per week for walking	numeric	22037
Summed MET minutes per week for all activity	numeric	22040
Summed days activity	numeric	22033
Summed minutes activity	numeric	22034
Usual walking pace	ordinal	924
Frequency of stair climbing in last 4 weeks	ordinal	943
Frequency of walking for pleasure in last 4 weeks	ordinal	971
Frequency of heavy DIY in last 4 weeks	ordinal	2624
Duration walking for pleasure	ordinal	981
Duration of light DIY	ordinal	1021
Duration of heavy DIY	ordinal	2634
Number of days/week walked 10+ minute	numeric	864
Duration of walks	ordinal	874
Number of days/week of moderate physical activity 10+ minutes	numeric	884
Duration of moderate activity	ordinal	894
Number of days/week of vigorous physical activity 10+ minutes	numeric	904
Time spent watching television (TV)	numeric	1070
Time spent using computer	numeric	1080
Leisure/social activities	one-hot	6160
Types of transport used (excluding work)	one-hot	6162
Types of physical activity in last 4 week	one-hot	6164
Frequency of other exercises in last 4 weeks	one-hot	3637
Smoking
Ever smoked	one-hot	20160
Ever stopped Smoking for 6+ months	one-hot	2907
Light smokers, at least 100 smokes in lifetime	one-hot	2644
Smoking status	one-hot	20116
Past tobacco Smoking	one-hot	1249
Type of tobacco previously smoked	one-hot	2877
Likelihood of resuming Smoking	one-hot	2936
Smoking/smokers in household	one-hot	1259
Current tobacco Smoking	one-hot	1239
Why stopped Smoking	one-hot	6157
Why reduced Smoking	one-hot	6158
Exposure to tobacco smoke at home	numeric	1269
Exposure to tobacco smoke outside home	numeric	1279
Alcohol
Alcohol drinker status	one-hot	20117
Alcohol intake frequency.	ordinal	1558
Alcohol intake versus 10 years previously	one-hot	1628
Reason for reducing amount of Alcohol drunk	one-hot	2664
Alcohol usually taken with meals	one-hot	1618
Former Alcohol drinker status	one-hot	3731
General Health
Overall health rating	one-hot	2178
Long-standing illness, disability or infirmity	one-hot	2188
Falls in the last year	one-hot	2296
Weight change compared with 1 year ago	one-hot	2306
Diet
Oily fish intake	ordinal	1329
Non-oily fish intake	ordinal	1339
Processed meat intake	ordinal	1349
Poultry intake	ordinal	1359
Beef intake	ordinal	1369
Lamb/mutton intake	ordinal	1379
Pork intake	ordinal	1389
Cheese intake	ordinal	1408
Hot drink temperature	ordinal	1518
Coffee type	one-hot	1508
Variation in Diet	one-hot	1548
Salt added to food	one-hot	1478
Non-butter spread type details	one-hot	2654
Bread type	one-hot	1448
Milk type used	one-hot	1418
Cereal type	one-hot	1468
Spread type	one-hot	1428
Major Dietary changes in the last 5 years	one-hot	1538
Never eat eggs, dairy, wheat, sugar	one-hot	6144
Cooked vegetable intake	ordinal	1289
Salad / raw vegetable intake	ordinal	1299
Fresh fruit intake	ordinal	1309
Dried fruit intake	ordinal	1319
Bread intake	ordinal	1438
Cereal intake	ordinal	1458
Tea intake	ordinal	1488
Coffee intake	ordinal	1498
Water intake	ordinal	1528

## Sheet: Diagnostic codes related to dis
Diagnostic codes related to disease categories.
Field ID	Code	Code description	Field Description
Cardio-Vascular Disease
41270 and 41280	I20	Angina pectoris	Hospital inpatient	Distribution of the subclasses of cardiovascular disease based on first ICD-10 code occurrence
41270 and 41280	I200	Unstable angina	Hospital inpatient
41270 and 41280	I201	Angina pectoris with documented spasm	Hospital inpatient
41270 and 41280	I208	Other forms of angina pectoris	Hospital inpatient
41270 and 41280	I209	Angina pectoris, unspecified	Hospital inpatient
41270 and 41280	I21	Acute myocardial infarction	Hospital inpatient
41270 and 41280	I210	Acute transmural myocardial infarction of anterior wall	Hospital inpatient
41270 and 41280	I211	Acute transmural myocardial infarction of inferior wall	Hospital inpatient
41270 and 41280	I212	Acute transmural myocardial infarction of other sites	Hospital inpatient
41270 and 41280	I213	Acute transmural myocardial infarction of unspecified site	Hospital inpatient
41270 and 41280	I214	Acute subendocardial myocardial infarction	Hospital inpatient
41270 and 41280	I219	Acute myocardial infarction, unspecified	Hospital inpatient
41270 and 41280	I22	Subsequent myocardial infarction	Hospital inpatient
41270 and 41280	I220	Subsequent myocardial infarction of anterior wall	Hospital inpatient
41270 and 41280	I221	Subsequent myocardial infarction of inferior wall	Hospital inpatient
41270 and 41280	I228	Subsequent myocardial infarction of other sites	Hospital inpatient
41270 and 41280	I229	Subsequent myocardial infarction of unspecified site	Hospital inpatient
41270 and 41280	I23	Certain current complications following acute myocardial infarction	Hospital inpatient
41270 and 41280	I230	Haemopericardium as current complication following acute myocardial infarction	Hospital inpatient
41270 and 41280	I231	Atrial septal defect as current complication following acute myocardial infarction	Hospital inpatient
41270 and 41280	I232	Ventricular septal defect as current complication following acute myocardial infarction	Hospital inpatient
41270 and 41280	I233	Rupture of cardiac wall without haemopericardium as current complication following acute myocardial infarction	Hospital inpatient
41270 and 41280	I234	Rupture of chordae tendineae as current complication following acute myocardial infarction	Hospital inpatient
41270 and 41280	I235	Rupture of papillary muscle as current complication following acute myocardial infarction	Hospital inpatient
41270 and 41280	I236	Thrombosis of atrium, auricular appendage, and ventricle as current complications following acute myocardial infarction	Hospital inpatient
41270 and 41280	I238	Other current complications following acute myocardial infarction	Hospital inpatient
41270 and 41280	I24	Other acute ischemic heart diseases	Hospital inpatient
41270 and 41280	I240	Coronary thrombosis not resulting in myocardial infarction	Hospital inpatient
41270 and 41280	I241	Dressler's syndrome	Hospital inpatient
41270 and 41280	I248	Other forms of acute ischemic heart disease	Hospital inpatient
41270 and 41280	I249	Acute ischemic heart disease, unspecified	Hospital inpatient
41270 and 41280	I25	Chronic ischemic heart disease	Hospital inpatient
41270 and 41280	I250	Atherosclerotic cardiovascular disease, so described	Hospital inpatient
41270 and 41280	I251	Atherosclerotic heart disease	Hospital inpatient
41270 and 41280	I252	Old myocardial infarction	Hospital inpatient
41270 and 41280	I253	Aneurysm of heart	Hospital inpatient
41270 and 41280	I254	Coronary artery aneurysm	Hospital inpatient
41270 and 41280	I255	ischemic cardiomyopathy	Hospital inpatient
41270 and 41280	I256	Silent myocardial ischaemia	Hospital inpatient
41270 and 41280	I258	Other forms of chronic ischemic heart disease	Hospital inpatient
41270 and 41280	I259	Chronic ischemic heart disease, unspecified	Hospital inpatient
41270 and 41280	I10	Essential (primary) hypertension	Hospital inpatient
41270 and 41280	I11	Hypertensive heart disease	Hospital inpatient
41270 and 41280	I110	Hypertensive heart disease with (congestive) heart failure	Hospital inpatient
41270 and 41280	I119	Hypertensive heart disease without (congestive) heart failure	Hospital inpatient
41270 and 41280	I12	Hypertensive renal disease	Hospital inpatient
41270 and 41280	I120	Hypertensive renal disease with renal failure	Hospital inpatient
41270 and 41280	I129	Hypertensive renal disease without renal failure	Hospital inpatient
41270 and 41280	I13	Hypertensive heart and renal disease	Hospital inpatient
41270 and 41280	I130	Hypertensive heart and renal disease with (congestive) heart failure	Hospital inpatient
41270 and 41280	I131	Hypertensive heart and renal disease with renal failure	Hospital inpatient
41270 and 41280	I132	Hypertensive heart and renal disease with both (congestive) heart failure and renal failure	Hospital inpatient
41270 and 41280	I139	Hypertensive heart and renal disease, unspecified	Hospital inpatient
41270 and 41280	I50	Heart failure	Hospital inpatient
41270 and 41280	I500	Congestive heart failure	Hospital inpatient
41270 and 41280	I501	Left ventricular failure	Hospital inpatient
41270 and 41280	I509	Heart failure, unspecified	Hospital inpatient
41270 and 41280	I60	Subarachnoid hemorrhage	Hospital inpatient
41270 and 41280	I600	Subarachnoid hemorrhage from carotid siphon and bifurcation	Hospital inpatient
41270 and 41280	I601	Subarachnoid hemorrhage from middle cerebral artery	Hospital inpatient
41270 and 41280	I602	Subarachnoid hemorrhage from anterior communicating artery	Hospital inpatient
41270 and 41280	I603	Subarachnoid hemorrhage from posterior communicating artery	Hospital inpatient
41270 and 41280	I604	Subarachnoid hemorrhage from basilar artery	Hospital inpatient
41270 and 41280	I605	Subarachnoid hemorrhage from vertebral artery	Hospital inpatient
41270 and 41280	I606	Subarachnoid hemorrhage from other intracranial arteries	Hospital inpatient
41270 and 41280	I607	Subarachnoid hemorrhage from intracranial artery, unspecified	Hospital inpatient
41270 and 41280	I608	Other subarachnoid hemorrhage	Hospital inpatient
41270 and 41280	I609	Subarachnoid hemorrhage, unspecified	Hospital inpatient
41270 and 41280	I61	Intracerebral hemorrhage	Hospital inpatient
41270 and 41280	I610	Intracerebral hemorrhage in hemisphere, subcortical	Hospital inpatient
41270 and 41280	I611	Intracerebral hemorrhage in hemisphere, cortical	Hospital inpatient
41270 and 41280	I612	Intracerebral hemorrhage in hemisphere, unspecified	Hospital inpatient
41270 and 41280	I613	Intracerebral hemorrhage in brain stem	Hospital inpatient
41270 and 41280	I614	Intracerebral hemorrhage in cerebellum	Hospital inpatient
41270 and 41280	I615	Intracerebral hemorrhage, intraventricular	Hospital inpatient
41270 and 41280	I616	Intracerebral hemorrhage, multiple localized	Hospital inpatient
41270 and 41280	I618	Other intracerebral hemorrhage	Hospital inpatient
41270 and 41280	I619	Intracerebral hemorrhage, unspecified	Hospital inpatient
41270 and 41280	I63	Cerebral infarction	Hospital inpatient
41270 and 41280	I630	Cerebral infarction due to thrombosis of precerebral arteries	Hospital inpatient
41270 and 41280	I631	Cerebral infarction due to embolism of precerebral arteries	Hospital inpatient
41270 and 41280	I632	Cerebral infarction due to unspecified occlusion or stenosis of precerebral arteries	Hospital inpatient
41270 and 41280	I633	Cerebral infarction due to thrombosis of cerebral arteries	Hospital inpatient
41270 and 41280	I634	Cerebral infarction due to embolism of cerebral arteries	Hospital inpatient
41270 and 41280	I635	Cerebral infarction due to unspecified occlusion or stenosis of cerebral arteries	Hospital inpatient
41270 and 41280	I636	Cerebral infarction due to cerebral venous thrombosis, nonpyogenic	Hospital inpatient
41270 and 41280	I638	Other cerebral infarction	Hospital inpatient
41270 and 41280	I639	Cerebral infarction, unspecified	Hospital inpatient
41270 and 41280	I64	Stroke, not specified as hemorrhage or infarction	Hospital inpatient
20002	1583	Ischaemic stroke	Self-reported
20002	1081	Stroke	Self-reported
20002	1086	Subarachnoid hemorrhage	Self-reported
20002	1491	Brain hemorrhage	Self-reported
20002	1074	Angina	Self-reported
20002	1075	Heart attack/myocardial infarction	Self-reported
20002	1065	Hypertension	Self-reported
20002	1072	Essential hypertension	Self-reported
20002	1076	Heart failure/pulmonary odema	Self-reported
42000		Date of myocardial infarction	Algorithmically-defined outcomes
42006		Date of stroke	Algorithmically-defined outcomes
Chronic Obstructive Pulmonary Disease (COPD)
41270 and 41280	J43	Emphysema	Hospital inpatient	No subclasses for distribution plot.
41270 and 41280	J430	MacLeod syndrome	Hospital inpatient
41270 and 41280	J431	Panlobular emphysema	Hospital inpatient
41270 and 41280	J432	Centrilobular emphysema	Hospital inpatient
41270 and 41280	J438	Other emphysema	Hospital inpatient
41270 and 41280	J439	Emphysema, unspecified	Hospital inpatient
41270 and 41280	J44	Other chronic obstructive pulmonary disease	Hospital inpatient
41270 and 41280	J440	Chronic obstructive pulmonary disease with acute lower respiratory infection	Hospital inpatient
41270 and 41280	J441	Chronic obstructive pulmonary disease with acute exacerbation, unspecified	Hospital inpatient
41270 and 41280	J448	Other specified chronic obstructive pulmonary disease	Hospital inpatient
41270 and 41280	J449	Chronic obstructive pulmonary disease, unspecified	Hospital inpatient
20002	1112	Chronic obstructive airways disease/COPD	Self-reported
20002	1113	Emphysema/chronic bronchitis	Self-reported
20002	1472	Emphysema	Self-reported
42016		Date of chronic obstructive pulmonary disease report	Algorithmically-defined outcomes
Chronic Kidney Disease (CKD)
41270 and 41280	N18	Chronic renal failure	Hospital inpatient	No subclasses for distribution plot.
41270 and 41280	N180	End-stage renal disease	Hospital inpatient
41270 and 41280	N181	Chronic kidney disease, stage 1	Hospital inpatient
41270 and 41280	N182	Chronic kidney disease, stage 2	Hospital inpatient
41270 and 41280	N183	Chronic kidney disease, stage 3	Hospital inpatient
41270 and 41280	N184	Chronic kidney disease, stage 4	Hospital inpatient
41270 and 41280	N185	Chronic kidney disease, stage 5	Hospital inpatient
41270 and 41280	N188	Other chronic renal failure	Hospital inpatient
41270 and 41280	N189	Chronic renal failure, unspecified	Hospital inpatient
20002	1192	Renal/kidney failure	Self-reported
20002	1193	Renal failure requiring dialysis	Self-reported
20002	1194	Renal failure not requiring dialysis	Self-reported
Cancer
400006, 40007, 41270, 40654	C00	Malignant neoplasm of lip	Cancer register and Hospital inpatient	Distribution of the subclasses of cancer based on first ICD-10 code occurrence
400006, 40007, 41270, 40655	C000	External upper lip	Cancer register and Hospital inpatient
400006, 40007, 41270, 40656	C001	External lower lip	Cancer register and Hospital inpatient
400006, 40007, 41270, 40657	C002	External lip, unspecified	Cancer register and Hospital inpatient
400006, 40007, 41270, 40658	C003	Upper lip, inner aspect	Cancer register and Hospital inpatient
400006, 40007, 41270, 40659	C004	Lower lip, inner aspect	Cancer register and Hospital inpatient
400006, 40007, 41270, 40660	C005	Lip, unspecified, inner aspect	Cancer register and Hospital inpatient
400006, 40007, 41270, 40661	C006	Commissure of lip	Cancer register and Hospital inpatient
400006, 40007, 41270, 40662	C008	Overlapping lesion of lip	Cancer register and Hospital inpatient
400006, 40007, 41270, 40663	C009	Lip, unspecified	Cancer register and Hospital inpatient
400006, 40007, 41270, 40664	C01	Malignant neoplasm of base of tongue	Cancer register and Hospital inpatient
400006, 40007, 41270, 40665	C02	Malignant neoplasm of other and unspecified parts of tongue	Cancer register and Hospital inpatient
400006, 40007, 41270, 40666	C020	Dorsal surface of tongue	Cancer register and Hospital inpatient
400006, 40007, 41270, 40667	C021	Border of tongue	Cancer register and Hospital inpatient
400006, 40007, 41270, 40668	C022	Ventral surface of tongue	Cancer register and Hospital inpatient
400006, 40007, 41270, 40669	C023	Anterior two-thirds of tongue, part unspecified	Cancer register and Hospital inpatient
400006, 40007, 41270, 40670	C024	Lingual tonsil	Cancer register and Hospital inpatient
400006, 40007, 41270, 40671	C028	Overlapping lesion of tongue	Cancer register and Hospital inpatient
400006, 40007, 41270, 40672	C029	Tongue, unspecified	Cancer register and Hospital inpatient
400006, 40007, 41270, 40673	C03	Malignant neoplasm of gum	Cancer register and Hospital inpatient
400006, 40007, 41270, 40674	C030	Upper gum	Cancer register and Hospital inpatient
400006, 40007, 41270, 40675	C031	Lower gum	Cancer register and Hospital inpatient
400006, 40007, 41270, 40676	C039	Gum, unspecified	Cancer register and Hospital inpatient
400006, 40007, 41270, 40677	C04	Malignant neoplasm of floor of mouth	Cancer register and Hospital inpatient
400006, 40007, 41270, 40678	C040	Anterior floor of mouth	Cancer register and Hospital inpatient
400006, 40007, 41270, 40679	C041	Lateral floor of mouth	Cancer register and Hospital inpatient
400006, 40007, 41270, 40680	C048	Overlapping lesion of floor of mouth	Cancer register and Hospital inpatient
400006, 40007, 41270, 40681	C049	Floor of mouth, unspecified	Cancer register and Hospital inpatient
400006, 40007, 41270, 40682	C05	Malignant neoplasm of palate	Cancer register and Hospital inpatient
400006, 40007, 41270, 40683	C050	Hard palate	Cancer register and Hospital inpatient
400006, 40007, 41270, 40684	C051	Soft palate	Cancer register and Hospital inpatient
400006, 40007, 41270, 40685	C052	Uvula	Cancer register and Hospital inpatient
400006, 40007, 41270, 40686	C058	Overlapping lesion of palate	Cancer register and Hospital inpatient
400006, 40007, 41270, 40687	C059	Palate, unspecified	Cancer register and Hospital inpatient
400006, 40007, 41270, 40688	C06	Malignant neoplasm of other and unspecified parts of mouth	Cancer register and Hospital inpatient
400006, 40007, 41270, 40689	C060	Cheek mucosa	Cancer register and Hospital inpatient
400006, 40007, 41270, 40690	C061	Vestibule of mouth	Cancer register and Hospital inpatient
400006, 40007, 41270, 40691	C062	Retromolar area	Cancer register and Hospital inpatient
400006, 40007, 41270, 40692	C068	Overlapping lesion of other and unspecified parts of mouth	Cancer register and Hospital inpatient
400006, 40007, 41270, 40693	C069	Mouth, unspecified	Cancer register and Hospital inpatient
400006, 40007, 41270, 40694	C07	Malignant neoplasm of parotid gland	Cancer register and Hospital inpatient
400006, 40007, 41270, 40695	C08	Malignant neoplasm of other and unspecified major salivary glands	Cancer register and Hospital inpatient
400006, 40007, 41270, 40696	C080	Submandibular gland	Cancer register and Hospital inpatient
400006, 40007, 41270, 40697	C081	Sublingual gland	Cancer register and Hospital inpatient
400006, 40007, 41270, 40698	C088	Overlapping lesion of major salivary glands	Cancer register and Hospital inpatient
400006, 40007, 41270, 40699	C089	Major salivary gland, unspecified	Cancer register and Hospital inpatient
400006, 40007, 41270, 40700	C09	Malignant neoplasm of tonsil	Cancer register and Hospital inpatient
400006, 40007, 41270, 40701	C090	Tonsillar fossa	Cancer register and Hospital inpatient
400006, 40007, 41270, 40702	C091	Tonsillar pillar (anterior) (posterior)	Cancer register and Hospital inpatient
400006, 40007, 41270, 40703	C098	Overlapping lesion of tonsil	Cancer register and Hospital inpatient
400006, 40007, 41270, 40704	C099	Tonsil, unspecified	Cancer register and Hospital inpatient
400006, 40007, 41270, 40705	C10	Malignant neoplasm of oropharynx	Cancer register and Hospital inpatient
400006, 40007, 41270, 40706	C100	Vallecula	Cancer register and Hospital inpatient
400006, 40007, 41270, 40707	C101	Anterior surface of epiglottis	Cancer register and Hospital inpatient
400006, 40007, 41270, 40708	C102	Lateral wall of oropharynx	Cancer register and Hospital inpatient
400006, 40007, 41270, 40709	C103	Posterior wall of oropharynx	Cancer register and Hospital inpatient
400006, 40007, 41270, 40710	C104	Branchial cleft	Cancer register and Hospital inpatient
400006, 40007, 41270, 40711	C108	Overlapping lesion of oropharynx	Cancer register and Hospital inpatient
400006, 40007, 41270, 40712	C109	Oropharynx, unspecified	Cancer register and Hospital inpatient
400006, 40007, 41270, 40713	C11	Malignant neoplasm of nasopharynx	Cancer register and Hospital inpatient
400006, 40007, 41270, 40714	C110	Superior wall of nasopharynx	Cancer register and Hospital inpatient
400006, 40007, 41270, 40715	C111	Posterior wall of nasopharynx	Cancer register and Hospital inpatient
400006, 40007, 41270, 40716	C112	Lateral wall of nasopharynx	Cancer register and Hospital inpatient
400006, 40007, 41270, 40717	C113	Anterior wall of nasopharynx	Cancer register and Hospital inpatient
400006, 40007, 41270, 40718	C118	Overlapping lesion of nasopharynx	Cancer register and Hospital inpatient
400006, 40007, 41270, 40719	C119	Nasopharynx, unspecified	Cancer register and Hospital inpatient
400006, 40007, 41270, 40720	C12	Malignant neoplasm of pyriform sinus	Cancer register and Hospital inpatient
400006, 40007, 41270, 40721	C13	Malignant neoplasm of hypopharynx	Cancer register and Hospital inpatient
400006, 40007, 41270, 40722	C130	Postcricoid region	Cancer register and Hospital inpatient
400006, 40007, 41270, 40723	C131	Aryepiglottic fold, hypopharyngeal aspect	Cancer register and Hospital inpatient
400006, 40007, 41270, 40724	C132	Posterior wall of hypopharynx	Cancer register and Hospital inpatient
400006, 40007, 41270, 40725	C138	Overlapping lesion of hypopharynx	Cancer register and Hospital inpatient
400006, 40007, 41270, 40726	C139	Hypopharynx, unspecified	Cancer register and Hospital inpatient
400006, 40007, 41270, 40727	C14	Malignant neoplasm of other and ill-defined sites in the lip, oral cavity and pharynx	Cancer register and Hospital inpatient
400006, 40007, 41270, 40728	C140	Pharynx, unspecified	Cancer register and Hospital inpatient
400006, 40007, 41270, 40729	C142	Waldeyer's ring	Cancer register and Hospital inpatient
400006, 40007, 41270, 40730	C148	Overlapping lesion of lip, oral cavity and pharynx	Cancer register and Hospital inpatient
400006, 40007, 41270, 40731	C15	Malignant neoplasm of oesophagus	Cancer register and Hospital inpatient
400006, 40007, 41270, 40732	C150	Cervical part of oesophagus	Cancer register and Hospital inpatient
400006, 40007, 41270, 40733	C151	Thoracic part of oesophagus	Cancer register and Hospital inpatient
400006, 40007, 41270, 40734	C152	Abdominal part of oesophagus	Cancer register and Hospital inpatient
400006, 40007, 41270, 40735	C153	Upper third of oesophagus	Cancer register and Hospital inpatient
400006, 40007, 41270, 40736	C154	Middle third of oesophagus	Cancer register and Hospital inpatient
400006, 40007, 41270, 40737	C155	Lower third of oesophagus	Cancer register and Hospital inpatient
400006, 40007, 41270, 40738	C158	Overlapping lesion of oesophagus	Cancer register and Hospital inpatient
400006, 40007, 41270, 40739	C159	Oesophagus, unspecified	Cancer register and Hospital inpatient
400006, 40007, 41270, 40740	C16	Malignant neoplasm of stomach	Cancer register and Hospital inpatient
400006, 40007, 41270, 40741	C160	Cardia	Cancer register and Hospital inpatient
400006, 40007, 41270, 40742	C161	Fundus of stomach	Cancer register and Hospital inpatient
400006, 40007, 41270, 40743	C162	Body of stomach	Cancer register and Hospital inpatient
400006, 40007, 41270, 40744	C163	Pyloric antrum	Cancer register and Hospital inpatient
400006, 40007, 41270, 40745	C164	Pylorus	Cancer register and Hospital inpatient
400006, 40007, 41270, 40746	C165	Lesser curvature of stomach, unspecified	Cancer register and Hospital inpatient
400006, 40007, 41270, 40747	C166	Greater curvature of stomach, unspecified	Cancer register and Hospital inpatient
400006, 40007, 41270, 40748	C168	Overlapping lesion of stomach	Cancer register and Hospital inpatient
400006, 40007, 41270, 40749	C169	Stomach, unspecified	Cancer register and Hospital inpatient
400006, 40007, 41270, 40750	C17	Malignant neoplasm of small intestine	Cancer register and Hospital inpatient
400006, 40007, 41270, 40751	C170	Duodenum	Cancer register and Hospital inpatient
400006, 40007, 41270, 40752	C171	Jejunum	Cancer register and Hospital inpatient
400006, 40007, 41270, 40753	C172	Ileum	Cancer register and Hospital inpatient
400006, 40007, 41270, 40754	C173	Meckel's diverticulum	Cancer register and Hospital inpatient
400006, 40007, 41270, 40755	C178	Overlapping lesion of small intestine	Cancer register and Hospital inpatient
400006, 40007, 41270, 40756	C179	Small intestine, unspecified	Cancer register and Hospital inpatient
400006, 40007, 41270, 40757	C18	Malignant neoplasm of colon	Cancer register and Hospital inpatient
400006, 40007, 41270, 40758	C180	Caecum	Cancer register and Hospital inpatient
400006, 40007, 41270, 40759	C181	Appendix	Cancer register and Hospital inpatient
400006, 40007, 41270, 40760	C182	Ascending colon	Cancer register and Hospital inpatient
400006, 40007, 41270, 40761	C183	Hepatic flexure	Cancer register and Hospital inpatient
400006, 40007, 41270, 40762	C184	Transverse colon	Cancer register and Hospital inpatient
400006, 40007, 41270, 40763	C185	Splenic flexure	Cancer register and Hospital inpatient
400006, 40007, 41270, 40764	C186	Descending colon	Cancer register and Hospital inpatient
400006, 40007, 41270, 40765	C187	Sigmoid colon	Cancer register and Hospital inpatient
400006, 40007, 41270, 40766	C188	Overlapping lesion of colon	Cancer register and Hospital inpatient
400006, 40007, 41270, 40767	C189	Colon, unspecified	Cancer register and Hospital inpatient
400006, 40007, 41270, 40768	C19	Malignant neoplasm of rectosigmoid junction	Cancer register and Hospital inpatient
400006, 40007, 41270, 40769	C20	Malignant neoplasm of rectum	Cancer register and Hospital inpatient
400006, 40007, 41270, 40770	C21	Malignant neoplasm of anus and anal canal	Cancer register and Hospital inpatient
400006, 40007, 41270, 40771	C210	Anus, unspecified	Cancer register and Hospital inpatient
400006, 40007, 41270, 40772	C211	Anal canal	Cancer register and Hospital inpatient
400006, 40007, 41270, 40773	C212	Cloacogenic zone	Cancer register and Hospital inpatient
400006, 40007, 41270, 40774	C218	Overlapping lesion of rectum, anus and anal canal	Cancer register and Hospital inpatient
400006, 40007, 41270, 40775	C22	Malignant neoplasm of liver and intrahepatic bile ducts	Cancer register and Hospital inpatient
400006, 40007, 41270, 40776	C220	Liver cell carcinoma	Cancer register and Hospital inpatient
400006, 40007, 41270, 40777	C221	Intrahepatic bile duct carcinoma	Cancer register and Hospital inpatient
400006, 40007, 41270, 40778	C222	Hepatoblastoma	Cancer register and Hospital inpatient
400006, 40007, 41270, 40779	C223	Angiosarcoma of liver	Cancer register and Hospital inpatient
400006, 40007, 41270, 40780	C224	Other sarcomas of liver	Cancer register and Hospital inpatient
400006, 40007, 41270, 40781	C227	Other specified carcinomas of liver	Cancer register and Hospital inpatient
400006, 40007, 41270, 40782	C229	Liver, unspecified	Cancer register and Hospital inpatient
400006, 40007, 41270, 40783	C23	Malignant neoplasm of gallbladder	Cancer register and Hospital inpatient
400006, 40007, 41270, 40784	C24	Malignant neoplasm of other and unspecified parts of biliary tract	Cancer register and Hospital inpatient
400006, 40007, 41270, 40785	C240	Extrahepatic bile duct	Cancer register and Hospital inpatient
400006, 40007, 41270, 40786	C241	Ampulla of Vater	Cancer register and Hospital inpatient
400006, 40007, 41270, 40787	C248	Overlapping lesion of biliary tract	Cancer register and Hospital inpatient
400006, 40007, 41270, 40788	C249	Biliary tract, unspecified	Cancer register and Hospital inpatient
400006, 40007, 41270, 40789	C25	Malignant neoplasm of pancreas	Cancer register and Hospital inpatient
400006, 40007, 41270, 40790	C250	Head of pancreas	Cancer register and Hospital inpatient
400006, 40007, 41270, 40791	C251	Body of pancreas	Cancer register and Hospital inpatient
400006, 40007, 41270, 40792	C252	Tail of pancreas	Cancer register and Hospital inpatient
400006, 40007, 41270, 40793	C253	Pancreatic duct	Cancer register and Hospital inpatient
400006, 40007, 41270, 40794	C254	Endocrine pancreas	Cancer register and Hospital inpatient
400006, 40007, 41270, 40795	C257	Other parts of pancreas	Cancer register and Hospital inpatient
400006, 40007, 41270, 40796	C258	Overlapping lesion of pancreas	Cancer register and Hospital inpatient
400006, 40007, 41270, 40797	C259	Pancreas, unspecified	Cancer register and Hospital inpatient
400006, 40007, 41270, 40798	C26	Malignant neoplasm of other and ill-defined digestive organs	Cancer register and Hospital inpatient
400006, 40007, 41270, 40799	C260	Intestinal tract, part unspecified	Cancer register and Hospital inpatient
400006, 40007, 41270, 40800	C261	Spleen	Cancer register and Hospital inpatient
400006, 40007, 41270, 40801	C268	Overlapping lesion of digestive system	Cancer register and Hospital inpatient
400006, 40007, 41270, 40802	C269	Ill-defined sites within the digestive system	Cancer register and Hospital inpatient
400006, 40007, 41270, 40803	C30	Malignant neoplasm of nasal cavity and middle ear	Cancer register and Hospital inpatient
400006, 40007, 41270, 40804	C300	Nasal cavity	Cancer register and Hospital inpatient
400006, 40007, 41270, 40805	C301	Middle ear	Cancer register and Hospital inpatient
400006, 40007, 41270, 40806	C31	Malignant neoplasm of accessory sinuses	Cancer register and Hospital inpatient
400006, 40007, 41270, 40807	C310	Maxillary sinus	Cancer register and Hospital inpatient
400006, 40007, 41270, 40808	C311	Ethmoidal sinus	Cancer register and Hospital inpatient
400006, 40007, 41270, 40809	C312	Frontal sinus	Cancer register and Hospital inpatient
400006, 40007, 41270, 40810	C313	Sphenoidal sinus	Cancer register and Hospital inpatient
400006, 40007, 41270, 40811	C318	Overlapping lesion of accessory sinuses	Cancer register and Hospital inpatient
400006, 40007, 41270, 40812	C319	Accessory sinus, unspecified	Cancer register and Hospital inpatient
400006, 40007, 41270, 40813	C32	Malignant neoplasm of larynx	Cancer register and Hospital inpatient
400006, 40007, 41270, 40814	C320	Glottis	Cancer register and Hospital inpatient
400006, 40007, 41270, 40815	C321	Supraglottis	Cancer register and Hospital inpatient
400006, 40007, 41270, 40816	C322	Subglottis	Cancer register and Hospital inpatient
400006, 40007, 41270, 40817	C323	Laryngeal cartilage	Cancer register and Hospital inpatient
400006, 40007, 41270, 40818	C328	Overlapping lesion of larynx	Cancer register and Hospital inpatient
400006, 40007, 41270, 40819	C329	Larynx, unspecified	Cancer register and Hospital inpatient
400006, 40007, 41270, 40820	C33	Malignant neoplasm of trachea	Cancer register and Hospital inpatient
400006, 40007, 41270, 40821	C34	Malignant neoplasm of bronchus and lung	Cancer register and Hospital inpatient
400006, 40007, 41270, 40822	C340	Main bronchus	Cancer register and Hospital inpatient
400006, 40007, 41270, 40823	C341	Upper lobe, bronchus or lung	Cancer register and Hospital inpatient
400006, 40007, 41270, 40824	C342	Middle lobe, bronchus or lung	Cancer register and Hospital inpatient
400006, 40007, 41270, 40825	C343	Lower lobe, bronchus or lung	Cancer register and Hospital inpatient
400006, 40007, 41270, 40826	C348	Overlapping lesion of bronchus and lung	Cancer register and Hospital inpatient
400006, 40007, 41270, 40827	C349	Bronchus or lung, unspecified	Cancer register and Hospital inpatient
400006, 40007, 41270, 40828	C37	Malignant neoplasm of thymus	Cancer register and Hospital inpatient
400006, 40007, 41270, 40829	C38	Malignant neoplasm of heart, mediastinum and pleura	Cancer register and Hospital inpatient
400006, 40007, 41270, 40830	C380	Heart	Cancer register and Hospital inpatient
400006, 40007, 41270, 40831	C381	Anterior mediastinum	Cancer register and Hospital inpatient
400006, 40007, 41270, 40832	C382	Posterior mediastinum	Cancer register and Hospital inpatient
400006, 40007, 41270, 40833	C383	Mediastinum, part unspecified	Cancer register and Hospital inpatient
400006, 40007, 41270, 40834	C384	Pleura	Cancer register and Hospital inpatient
400006, 40007, 41270, 40835	C388	Overlapping lesion of heart, mediastinum and pleura	Cancer register and Hospital inpatient
400006, 40007, 41270, 40836	C39	Malignant neoplasm of other and ill-defined sites in the respiratory system and intrathoracic organs	Cancer register and Hospital inpatient
400006, 40007, 41270, 40837	C390	Upper respiratory tract, part unspecified	Cancer register and Hospital inpatient
400006, 40007, 41270, 40838	C398	Overlapping lesion of respiratory and intrathoracic organs	Cancer register and Hospital inpatient
400006, 40007, 41270, 40839	C399	Ill-defined sites within the respiratory system	Cancer register and Hospital inpatient
400006, 40007, 41270, 40840	C40	Malignant neoplasm of bone and articular cartilage of limbs	Cancer register and Hospital inpatient
400006, 40007, 41270, 40841	C400	Scapula and long bones of upper limb	Cancer register and Hospital inpatient
400006, 40007, 41270, 40842	C401	Short bones of upper limb	Cancer register and Hospital inpatient
400006, 40007, 41270, 40843	C402	Long bones of lower limb	Cancer register and Hospital inpatient
400006, 40007, 41270, 40844	C403	Short bones of lower limb	Cancer register and Hospital inpatient
400006, 40007, 41270, 40845	C408	Overlapping lesion of bone and articular cartilage of limbs	Cancer register and Hospital inpatient
400006, 40007, 41270, 40846	C409	Bone and articular cartilage of limb, unspecified	Cancer register and Hospital inpatient
400006, 40007, 41270, 40847	C41	Malignant neoplasm of bone and articular cartilage of other and unspecified sites	Cancer register and Hospital inpatient
400006, 40007, 41270, 40848	C410	Bones of skull and face	Cancer register and Hospital inpatient
400006, 40007, 41270, 40849	C411	Mandible	Cancer register and Hospital inpatient
400006, 40007, 41270, 40850	C412	Vertebral column	Cancer register and Hospital inpatient
400006, 40007, 41270, 40851	C413	Ribs, sternum and clavicle	Cancer register and Hospital inpatient
400006, 40007, 41270, 40852	C414	Pelvic bones, sacrum and coccyx	Cancer register and Hospital inpatient
400006, 40007, 41270, 40853	C418	Overlapping lesion of bone and articular cartilage	Cancer register and Hospital inpatient
400006, 40007, 41270, 40854	C419	Bone and articular cartilage, unspecified	Cancer register and Hospital inpatient
400006, 40007, 41270, 40855	C42	hematopoietic and reticuloendothelial systems (ICD-O-3 specific)	Cancer register and Hospital inpatient
400006, 40007, 41270, 40856	C420	hematopoietic and reticuloendothelial systems: blood (ICD-O-3 specific)	Cancer register and Hospital inpatient
400006, 40007, 41270, 40857	C421	hematopoietic and reticuloendothelial systems: bone marrow (ICD-O-3 specific)	Cancer register and Hospital inpatient
400006, 40007, 41270, 40858	C422	hematopoietic and reticuloendothelial systems: spleen (ICD-O-3 specific)	Cancer register and Hospital inpatient
400006, 40007, 41270, 40859	C423	hematopoietic and reticuloendothelial systems: Reticuloendothelial system, NOS (ICD-O-3 specific)	Cancer register and Hospital inpatient
400006, 40007, 41270, 40860	C424	hematopoietic and reticuloendothelial systems: Hematopoietic system, NOS (ICD-O-3 specific)	Cancer register and Hospital inpatient
400006, 40007, 41270, 40861	C45	Mesothelioma	Cancer register and Hospital inpatient
400006, 40007, 41270, 40862	C450	Mesothelioma of pleura	Cancer register and Hospital inpatient
400006, 40007, 41270, 40863	C451	Mesothelioma of peritoneum	Cancer register and Hospital inpatient
400006, 40007, 41270, 40864	C452	Mesothelioma of pericardium	Cancer register and Hospital inpatient
400006, 40007, 41270, 40865	C457	Mesothelioma of other sites	Cancer register and Hospital inpatient
400006, 40007, 41270, 40866	C459	Mesothelioma, unspecified	Cancer register and Hospital inpatient
400006, 40007, 41270, 40867	C46	Kaposi's sarcoma	Cancer register and Hospital inpatient
400006, 40007, 41270, 40868	C460	Kaposi's sarcoma of skin	Cancer register and Hospital inpatient
400006, 40007, 41270, 40869	C461	Kaposi's sarcoma of soft tissue	Cancer register and Hospital inpatient
400006, 40007, 41270, 40870	C462	Kaposi's sarcoma of palate	Cancer register and Hospital inpatient
400006, 40007, 41270, 40871	C463	Kaposi's sarcoma of lymph nodes	Cancer register and Hospital inpatient
400006, 40007, 41270, 40872	C467	Kaposi's sarcoma of other sites	Cancer register and Hospital inpatient
400006, 40007, 41270, 40873	C468	Kaposi's sarcoma of multiple organs	Cancer register and Hospital inpatient
400006, 40007, 41270, 40874	C469	Kaposi's sarcoma, unspecified	Cancer register and Hospital inpatient
400006, 40007, 41270, 40875	C47	Malignant neoplasm of peripheral nerves and autonomic nervous system	Cancer register and Hospital inpatient
400006, 40007, 41270, 40876	C470	Peripheral nerves of head, face and neck	Cancer register and Hospital inpatient
400006, 40007, 41270, 40877	C471	Peripheral nerves of upper limb, including shoulder	Cancer register and Hospital inpatient
400006, 40007, 41270, 40878	C472	Peripheral nerves of lower limb, including hip	Cancer register and Hospital inpatient
400006, 40007, 41270, 40879	C473	Peripheral nerves of thorax	Cancer register and Hospital inpatient
400006, 40007, 41270, 40880	C474	Peripheral nerves of abdomen	Cancer register and Hospital inpatient
400006, 40007, 41270, 40881	C475	Peripheral nerves of pelvis	Cancer register and Hospital inpatient
400006, 40007, 41270, 40882	C476	Peripheral nerves of trunk, unspecified	Cancer register and Hospital inpatient
400006, 40007, 41270, 40883	C478	Overlapping lesion of peripheral nerves and autonomic nervous system	Cancer register and Hospital inpatient
400006, 40007, 41270, 40884	C479	Peripheral nerves and autonomic nervous system, unspecified	Cancer register and Hospital inpatient
400006, 40007, 41270, 40885	C48	Malignant neoplasm of retroperitoneum and peritoneum	Cancer register and Hospital inpatient
400006, 40007, 41270, 40886	C480	Retroperitoneum	Cancer register and Hospital inpatient
400006, 40007, 41270, 40887	C481	Specified parts of peritoneum	Cancer register and Hospital inpatient
400006, 40007, 41270, 40888	C482	Peritoneum, unspecified	Cancer register and Hospital inpatient
400006, 40007, 41270, 40889	C488	Overlapping lesion of retroperitoneum and peritoneum	Cancer register and Hospital inpatient
400006, 40007, 41270, 40890	C49	Malignant neoplasm of other connective and soft tissue	Cancer register and Hospital inpatient
400006, 40007, 41270, 40891	C490	Connective and soft tissue of head, face and neck	Cancer register and Hospital inpatient
400006, 40007, 41270, 40892	C491	Connective and soft tissue of upper limb, including shoulder	Cancer register and Hospital inpatient
400006, 40007, 41270, 40893	C492	Connective and soft tissue of lower limb, including hip	Cancer register and Hospital inpatient
400006, 40007, 41270, 40894	C493	Connective and soft tissue of thorax	Cancer register and Hospital inpatient
400006, 40007, 41270, 40895	C494	Connective and soft tissue of abdomen	Cancer register and Hospital inpatient
400006, 40007, 41270, 40896	C495	Connective and soft tissue of pelvis	Cancer register and Hospital inpatient
400006, 40007, 41270, 40897	C496	Connective and soft tissue of trunk, unspecified	Cancer register and Hospital inpatient
400006, 40007, 41270, 40898	C498	Overlapping lesion of connective and soft tissue	Cancer register and Hospital inpatient
400006, 40007, 41270, 40899	C499	Connective and soft tissue, unspecified	Cancer register and Hospital inpatient
400006, 40007, 41270, 40900	C50	Malignant neoplasm of breast	Cancer register and Hospital inpatient
400006, 40007, 41270, 40901	C500	Nipple and areola	Cancer register and Hospital inpatient
400006, 40007, 41270, 40902	C501	Central portion of breast	Cancer register and Hospital inpatient
400006, 40007, 41270, 40903	C502	Upper-inner quadrant of breast	Cancer register and Hospital inpatient
400006, 40007, 41270, 40904	C503	Lower-inner quadrant of breast	Cancer register and Hospital inpatient
400006, 40007, 41270, 40905	C504	Upper-outer quadrant of breast	Cancer register and Hospital inpatient
400006, 40007, 41270, 40906	C505	Lower-outer quadrant of breast	Cancer register and Hospital inpatient
400006, 40007, 41270, 40907	C506	Axillary tail of breast	Cancer register and Hospital inpatient
400006, 40007, 41270, 40908	C508	Overlapping lesion of breast	Cancer register and Hospital inpatient
400006, 40007, 41270, 40909	C509	Breast, unspecified	Cancer register and Hospital inpatient
400006, 40007, 41270, 40910	C51	Malignant neoplasm of vulva	Cancer register and Hospital inpatient
400006, 40007, 41270, 40911	C510	Labium majus	Cancer register and Hospital inpatient
400006, 40007, 41270, 40912	C511	Labium minus	Cancer register and Hospital inpatient
400006, 40007, 41270, 40913	C512	Clitoris	Cancer register and Hospital inpatient
400006, 40007, 41270, 40914	C518	Overlapping lesion of vulva	Cancer register and Hospital inpatient
400006, 40007, 41270, 40915	C519	Vulva, unspecified	Cancer register and Hospital inpatient
400006, 40007, 41270, 40916	C52	Malignant neoplasm of vagina	Cancer register and Hospital inpatient
400006, 40007, 41270, 40917	C53	Malignant neoplasm of cervix uteri	Cancer register and Hospital inpatient
400006, 40007, 41270, 40918	C530	Endocervix	Cancer register and Hospital inpatient
400006, 40007, 41270, 40919	C531	Exocervix	Cancer register and Hospital inpatient
400006, 40007, 41270, 40920	C538	Overlapping lesion of cervix uteri	Cancer register and Hospital inpatient
400006, 40007, 41270, 40921	C539	Cervix uteri, unspecified	Cancer register and Hospital inpatient
400006, 40007, 41270, 40922	C54	Malignant neoplasm of corpus uteri	Cancer register and Hospital inpatient
400006, 40007, 41270, 40923	C540	Isthmus uteri	Cancer register and Hospital inpatient
400006, 40007, 41270, 40924	C541	Endometrium	Cancer register and Hospital inpatient
400006, 40007, 41270, 40925	C542	Myometrium	Cancer register and Hospital inpatient
400006, 40007, 41270, 40926	C543	Fundus uteri	Cancer register and Hospital inpatient
400006, 40007, 41270, 40927	C548	Overlapping lesion of corpus uteri	Cancer register and Hospital inpatient
400006, 40007, 41270, 40928	C549	Corpus uteri, unspecified	Cancer register and Hospital inpatient
400006, 40007, 41270, 40929	C55	Malignant neoplasm of uterus, part unspecified	Cancer register and Hospital inpatient
400006, 40007, 41270, 40930	C56	Malignant neoplasm of ovary	Cancer register and Hospital inpatient
400006, 40007, 41270, 40931	C57	Malignant neoplasm of other and unspecified female genital organs	Cancer register and Hospital inpatient
400006, 40007, 41270, 40932	C570	Fallopian tube	Cancer register and Hospital inpatient
400006, 40007, 41270, 40933	C571	Broad ligament	Cancer register and Hospital inpatient
400006, 40007, 41270, 40934	C572	Round ligament	Cancer register and Hospital inpatient
400006, 40007, 41270, 40935	C573	Parametrium	Cancer register and Hospital inpatient
400006, 40007, 41270, 40936	C574	Uterine adnexa, unspecified	Cancer register and Hospital inpatient
400006, 40007, 41270, 40937	C577	Other specified female genital organs	Cancer register and Hospital inpatient
400006, 40007, 41270, 40938	C578	Overlapping lesion of female genital organs	Cancer register and Hospital inpatient
400006, 40007, 41270, 40939	C579	Female genital organ, unspecified	Cancer register and Hospital inpatient
400006, 40007, 41270, 40940	C58	Malignant neoplasm of placenta	Cancer register and Hospital inpatient
400006, 40007, 41270, 40941	C60	Malignant neoplasm of penis	Cancer register and Hospital inpatient
400006, 40007, 41270, 40942	C600	Prepuce	Cancer register and Hospital inpatient
400006, 40007, 41270, 40943	C601	Glans penis	Cancer register and Hospital inpatient
400006, 40007, 41270, 40944	C602	Body of penis	Cancer register and Hospital inpatient
400006, 40007, 41270, 40945	C608	Overlapping lesion of penis	Cancer register and Hospital inpatient
400006, 40007, 41270, 40946	C609	Penis, unspecified	Cancer register and Hospital inpatient
400006, 40007, 41270, 40947	C61	Malignant neoplasm of prostate	Cancer register and Hospital inpatient
400006, 40007, 41270, 40948	C62	Malignant neoplasm of testis	Cancer register and Hospital inpatient
400006, 40007, 41270, 40949	C620	Undescended testis	Cancer register and Hospital inpatient
400006, 40007, 41270, 40950	C621	Descended testis	Cancer register and Hospital inpatient
400006, 40007, 41270, 40951	C629	Testis, unspecified	Cancer register and Hospital inpatient
400006, 40007, 41270, 40952	C63	Malignant neoplasm of other and unspecified male genital organs	Cancer register and Hospital inpatient
400006, 40007, 41270, 40953	C630	Epididymis	Cancer register and Hospital inpatient
400006, 40007, 41270, 40954	C631	Spermatic cord	Cancer register and Hospital inpatient
400006, 40007, 41270, 40955	C632	Scrotum	Cancer register and Hospital inpatient
400006, 40007, 41270, 40956	C637	Other specified male genital organs	Cancer register and Hospital inpatient
400006, 40007, 41270, 40957	C638	Overlapping lesion of male genital organs	Cancer register and Hospital inpatient
400006, 40007, 41270, 40958	C639	Male genital organ, unspecified	Cancer register and Hospital inpatient
400006, 40007, 41270, 40959	C64	Malignant neoplasm of kidney, except renal pelvis	Cancer register and Hospital inpatient
400006, 40007, 41270, 40960	C65	Malignant neoplasm of renal pelvis	Cancer register and Hospital inpatient
400006, 40007, 41270, 40961	C66	Malignant neoplasm of ureter	Cancer register and Hospital inpatient
400006, 40007, 41270, 40962	C67	Malignant neoplasm of bladder	Cancer register and Hospital inpatient
400006, 40007, 41270, 40963	C670	Trigone of bladder	Cancer register and Hospital inpatient
400006, 40007, 41270, 40964	C671	Dome of bladder	Cancer register and Hospital inpatient
400006, 40007, 41270, 40965	C672	Lateral wall of bladder	Cancer register and Hospital inpatient
400006, 40007, 41270, 40966	C673	Anterior wall of bladder	Cancer register and Hospital inpatient
400006, 40007, 41270, 40967	C674	Posterior wall of bladder	Cancer register and Hospital inpatient
400006, 40007, 41270, 40968	C675	Bladder neck	Cancer register and Hospital inpatient
400006, 40007, 41270, 40969	C676	Ureteric orifice	Cancer register and Hospital inpatient
400006, 40007, 41270, 40970	C677	Urachus	Cancer register and Hospital inpatient
400006, 40007, 41270, 40971	C678	Overlapping lesion of bladder	Cancer register and Hospital inpatient
400006, 40007, 41270, 40972	C679	Bladder, unspecified	Cancer register and Hospital inpatient
400006, 40007, 41270, 40973	C68	Malignant neoplasm of other and unspecified urinary organs	Cancer register and Hospital inpatient
400006, 40007, 41270, 40974	C680	Urethra	Cancer register and Hospital inpatient
400006, 40007, 41270, 40975	C681	Paraurethral glands	Cancer register and Hospital inpatient
400006, 40007, 41270, 40976	C688	Overlapping lesion of urinary organs	Cancer register and Hospital inpatient
400006, 40007, 41270, 40977	C689	Urinary organ, unspecified	Cancer register and Hospital inpatient
400006, 40007, 41270, 40978	C69	Malignant neoplasm of eye and adnexa	Cancer register and Hospital inpatient
400006, 40007, 41270, 40979	C690	Conjunctiva	Cancer register and Hospital inpatient
400006, 40007, 41270, 40980	C691	Cornea	Cancer register and Hospital inpatient
400006, 40007, 41270, 40981	C692	Retina	Cancer register and Hospital inpatient
400006, 40007, 41270, 40982	C693	Choroid	Cancer register and Hospital inpatient
400006, 40007, 41270, 40983	C694	Ciliary body	Cancer register and Hospital inpatient
400006, 40007, 41270, 40984	C695	Lachrymal gland and duct	Cancer register and Hospital inpatient
400006, 40007, 41270, 40985	C696	Orbit	Cancer register and Hospital inpatient
400006, 40007, 41270, 40986	C698	Overlapping lesion of eye and adnexa	Cancer register and Hospital inpatient
400006, 40007, 41270, 40987	C699	Eye, unspecified	Cancer register and Hospital inpatient
400006, 40007, 41270, 40988	C70	Malignant neoplasm of meninges	Cancer register and Hospital inpatient
400006, 40007, 41270, 40989	C700	Cerebral meninges	Cancer register and Hospital inpatient
400006, 40007, 41270, 40990	C701	Spinal meninges	Cancer register and Hospital inpatient
400006, 40007, 41270, 40991	C709	Meninges, unspecified	Cancer register and Hospital inpatient
400006, 40007, 41270, 40992	C71	Malignant neoplasm of brain	Cancer register and Hospital inpatient
400006, 40007, 41270, 40993	C710	Cerebrum, except lobes and ventricles	Cancer register and Hospital inpatient
400006, 40007, 41270, 40994	C711	Frontal lobe	Cancer register and Hospital inpatient
400006, 40007, 41270, 40995	C712	Temporal lobe	Cancer register and Hospital inpatient
400006, 40007, 41270, 40996	C713	Parietal lobe	Cancer register and Hospital inpatient
400006, 40007, 41270, 40997	C714	Occipital lobe	Cancer register and Hospital inpatient
400006, 40007, 41270, 40998	C715	Cerebral ventricle	Cancer register and Hospital inpatient
400006, 40007, 41270, 40999	C716	Cerebellum	Cancer register and Hospital inpatient
400006, 40007, 41270, 41000	C717	Brain stem	Cancer register and Hospital inpatient
400006, 40007, 41270, 41001	C718	Overlapping lesion of brain	Cancer register and Hospital inpatient
400006, 40007, 41270, 41002	C719	Brain, unspecified	Cancer register and Hospital inpatient
400006, 40007, 41270, 41003	C72	Malignant neoplasm of spinal cord, cranial nerves and other parts of central nervous system	Cancer register and Hospital inpatient
400006, 40007, 41270, 41004	C720	Spinal cord	Cancer register and Hospital inpatient
400006, 40007, 41270, 41005	C721	Cauda equina	Cancer register and Hospital inpatient
400006, 40007, 41270, 41006	C722	Olfactory nerve	Cancer register and Hospital inpatient
400006, 40007, 41270, 41007	C723	Optic nerve	Cancer register and Hospital inpatient
400006, 40007, 41270, 41008	C724	Acoustic nerve	Cancer register and Hospital inpatient
400006, 40007, 41270, 41009	C725	Other and unspecified cranial nerves	Cancer register and Hospital inpatient
400006, 40007, 41270, 41010	C728	Overlapping lesion of brain and other parts of central nervous system	Cancer register and Hospital inpatient
400006, 40007, 41270, 41011	C729	Central nervous system, unspecified	Cancer register and Hospital inpatient
400006, 40007, 41270, 41012	C73	Malignant neoplasm of thyroid gland	Cancer register and Hospital inpatient
400006, 40007, 41270, 41013	C74	Malignant neoplasm of adrenal gland	Cancer register and Hospital inpatient
400006, 40007, 41270, 41014	C740	Cortex of adrenal gland	Cancer register and Hospital inpatient
400006, 40007, 41270, 41015	C741	Medulla of adrenal gland	Cancer register and Hospital inpatient
400006, 40007, 41270, 41016	C749	Adrenal gland, unspecified	Cancer register and Hospital inpatient
400006, 40007, 41270, 41017	C75	Malignant neoplasm of other endocrine glands and related structures	Cancer register and Hospital inpatient
400006, 40007, 41270, 41018	C750	Parathyroid gland	Cancer register and Hospital inpatient
400006, 40007, 41270, 41019	C751	Pituitary gland	Cancer register and Hospital inpatient
400006, 40007, 41270, 41020	C752	Craniopharyngeal duct	Cancer register and Hospital inpatient
400006, 40007, 41270, 41021	C753	Pineal gland	Cancer register and Hospital inpatient
400006, 40007, 41270, 41022	C754	Carotid body	Cancer register and Hospital inpatient
400006, 40007, 41270, 41023	C755	Aortic body and other paraganglia	Cancer register and Hospital inpatient
400006, 40007, 41270, 41024	C758	Pluriglandular involvement, unspecified	Cancer register and Hospital inpatient
400006, 40007, 41270, 41025	C759	Endocrine gland, unspecified	Cancer register and Hospital inpatient
400006, 40007, 41270, 41026	C76	Malignant neoplasm of other and ill-defined sites	Cancer register and Hospital inpatient
400006, 40007, 41270, 41027	C760	Head, face and neck	Cancer register and Hospital inpatient
400006, 40007, 41270, 41028	C761	Thorax	Cancer register and Hospital inpatient
400006, 40007, 41270, 41029	C762	Abdomen	Cancer register and Hospital inpatient
400006, 40007, 41270, 41030	C763	Pelvis	Cancer register and Hospital inpatient
400006, 40007, 41270, 41031	C764	Upper limb	Cancer register and Hospital inpatient
400006, 40007, 41270, 41032	C765	Lower limb	Cancer register and Hospital inpatient
400006, 40007, 41270, 41033	C767	Other ill-defined sites	Cancer register and Hospital inpatient
400006, 40007, 41270, 41034	C768	Overlapping lesion of other and ill-defined sites	Cancer register and Hospital inpatient
400006, 40007, 41270, 41035	C77	Secondary and unspecified malignant neoplasm of lymph nodes	Cancer register and Hospital inpatient
400006, 40007, 41270, 41036	C770	Lymph nodes of head, face and neck	Cancer register and Hospital inpatient
400006, 40007, 41270, 41037	C771	Intrathoracic lymph nodes	Cancer register and Hospital inpatient
400006, 40007, 41270, 41038	C772	Intra-abdominal lymph nodes	Cancer register and Hospital inpatient
400006, 40007, 41270, 41039	C773	Axillary and upper limb lymph nodes	Cancer register and Hospital inpatient
400006, 40007, 41270, 41040	C774	Inguinal and lower limb lymph nodes	Cancer register and Hospital inpatient
400006, 40007, 41270, 41041	C775	Intrapelvic lymph nodes	Cancer register and Hospital inpatient
400006, 40007, 41270, 41042	C778	Lymph nodes of multiple regions	Cancer register and Hospital inpatient
400006, 40007, 41270, 41043	C779	Lymph node, unspecified	Cancer register and Hospital inpatient
400006, 40007, 41270, 41044	C78	Secondary malignant neoplasm of respiratory and digestive organs	Cancer register and Hospital inpatient
400006, 40007, 41270, 41045	C780	Secondary malignant neoplasm of lung	Cancer register and Hospital inpatient
400006, 40007, 41270, 41046	C781	Secondary malignant neoplasm of mediastinum	Cancer register and Hospital inpatient
400006, 40007, 41270, 41047	C782	Secondary malignant neoplasm of pleura	Cancer register and Hospital inpatient
400006, 40007, 41270, 41048	C783	Secondary malignant neoplasm of other and unspecified respiratory organs	Cancer register and Hospital inpatient
400006, 40007, 41270, 41049	C784	Secondary malignant neoplasm of small intestine	Cancer register and Hospital inpatient
400006, 40007, 41270, 41050	C785	Secondary malignant neoplasm of large intestine and rectum	Cancer register and Hospital inpatient
400006, 40007, 41270, 41051	C786	Secondary malignant neoplasm of retroperitoneum and peritoneum	Cancer register and Hospital inpatient
400006, 40007, 41270, 41052	C787	Secondary malignant neoplasm of liver	Cancer register and Hospital inpatient
400006, 40007, 41270, 41053	C788	Secondary malignant neoplasm of other and unspecified digestive organs	Cancer register and Hospital inpatient
400006, 40007, 41270, 41054	C79	Secondary malignant neoplasm of other sites	Cancer register and Hospital inpatient
400006, 40007, 41270, 41055	C790	Secondary malignant neoplasm of kidney and renal pelvis	Cancer register and Hospital inpatient
400006, 40007, 41270, 41056	C791	Secondary malignant neoplasm of bladder and other and unspecified urinary organs	Cancer register and Hospital inpatient
400006, 40007, 41270, 41057	C792	Secondary malignant neoplasm of skin	Cancer register and Hospital inpatient
400006, 40007, 41270, 41058	C793	Secondary malignant neoplasm of brain and cerebral meninges	Cancer register and Hospital inpatient
400006, 40007, 41270, 41059	C794	Secondary malignant neoplasm of other and unspecified parts of nervous system	Cancer register and Hospital inpatient
400006, 40007, 41270, 41060	C795	Secondary malignant neoplasm of bone and bone marrow	Cancer register and Hospital inpatient
400006, 40007, 41270, 41061	C796	Secondary malignant neoplasm of ovary	Cancer register and Hospital inpatient
400006, 40007, 41270, 41062	C797	Secondary malignant neoplasm of adrenal gland	Cancer register and Hospital inpatient
400006, 40007, 41270, 41063	C798	Secondary malignant neoplasm of other specified sites	Cancer register and Hospital inpatient
400006, 40007, 41270, 41064	C799	Secondary malignant neoplasm, unspecified site	Cancer register and Hospital inpatient
400006, 40007, 41270, 41065	C80	Malignant neoplasm without specification of site	Cancer register and Hospital inpatient
400006, 40007, 41270, 41066	C800	Malignant neoplasm, primary site unknown, so stated	Cancer register and Hospital inpatient
400006, 40007, 41270, 41067	C809	Malignant neoplasm, unspecified	Cancer register and Hospital inpatient
400006, 40007, 41270, 41068	C81	Hodgkin's disease	Cancer register and Hospital inpatient
400006, 40007, 41270, 41069	C810	Lymphocytic predominance	Cancer register and Hospital inpatient
400006, 40007, 41270, 41070	C811	Nodular sclerosis	Cancer register and Hospital inpatient
400006, 40007, 41270, 41071	C812	Mixed cellularity	Cancer register and Hospital inpatient
400006, 40007, 41270, 41072	C813	Lymphocytic depletion	Cancer register and Hospital inpatient
400006, 40007, 41270, 41073	C814	Lymphocyte-rich classical Hodgkin lymphoma	Cancer register and Hospital inpatient
400006, 40007, 41270, 41074	C817	Other Hodgkin's disease	Cancer register and Hospital inpatient
400006, 40007, 41270, 41075	C819	Hodgkin's disease, unspecified	Cancer register and Hospital inpatient
400006, 40007, 41270, 41076	C82	Follicular [nodular] non-Hodgkin's lymphoma	Cancer register and Hospital inpatient
400006, 40007, 41270, 41077	C820	Small cleaved cell, follicular	Cancer register and Hospital inpatient
400006, 40007, 41270, 41078	C821	Mixed small cleaved and large cell, follicular	Cancer register and Hospital inpatient
400006, 40007, 41270, 41079	C822	Large cell, follicular	Cancer register and Hospital inpatient
400006, 40007, 41270, 41080	C823	Follicular lymphoma grade IIIa	Cancer register and Hospital inpatient
400006, 40007, 41270, 41081	C824	Follicular lymphoma grade IIIb	Cancer register and Hospital inpatient
400006, 40007, 41270, 41082	C825	Diffuse follicle centre lymphoma	Cancer register and Hospital inpatient
400006, 40007, 41270, 41083	C826	Cutaneous follicle centre lymphoma	Cancer register and Hospital inpatient
400006, 40007, 41270, 41084	C827	Other types of follicular non-Hodgkin's lymphoma	Cancer register and Hospital inpatient
400006, 40007, 41270, 41085	C829	Follicular non-Hodgkin's lymphoma, unspecified	Cancer register and Hospital inpatient
400006, 40007, 41270, 41086	C83	Diffuse non-Hodgkin's lymphoma	Cancer register and Hospital inpatient
400006, 40007, 41270, 41087	C830	Small cell (diffuse)	Cancer register and Hospital inpatient
400006, 40007, 41270, 41088	C831	Small cleaved cell (diffuse)	Cancer register and Hospital inpatient
400006, 40007, 41270, 41089	C832	Mixed small and large cell (diffuse)	Cancer register and Hospital inpatient
400006, 40007, 41270, 41090	C833	Large cell (diffuse)	Cancer register and Hospital inpatient
400006, 40007, 41270, 41091	C834	Immunoblastic (diffuse)	Cancer register and Hospital inpatient
400006, 40007, 41270, 41092	C835	Lymphoblastic (diffuse)	Cancer register and Hospital inpatient
400006, 40007, 41270, 41093	C836	Undifferentiated (diffuse)	Cancer register and Hospital inpatient
400006, 40007, 41270, 41094	C837	Burkitt's tumour	Cancer register and Hospital inpatient
400006, 40007, 41270, 41095	C838	Other types of diffuse non-Hodgkin's lymphoma	Cancer register and Hospital inpatient
400006, 40007, 41270, 41096	C839	Diffuse non-Hodgkin's lymphoma, unspecified	Cancer register and Hospital inpatient
400006, 40007, 41270, 41097	C84	Peripheral and cutaneous T-cell lymphomas	Cancer register and Hospital inpatient
400006, 40007, 41270, 41098	C840	Mycosis fungoides	Cancer register and Hospital inpatient
400006, 40007, 41270, 41099	C841	Sezary's diease	Cancer register and Hospital inpatient
400006, 40007, 41270, 41100	C842	T-zone lymphoma	Cancer register and Hospital inpatient
400006, 40007, 41270, 41101	C843	Lymphoepithelioid lymphoma	Cancer register and Hospital inpatient
400006, 40007, 41270, 41102	C844	Peripheral T-cell lymphoma	Cancer register and Hospital inpatient
400006, 40007, 41270, 41103	C845	Other and unspecified T-cell lymphomas	Cancer register and Hospital inpatient
400006, 40007, 41270, 41104	C846	Anaplastic large cell lymphoma, ALK-positive	Cancer register and Hospital inpatient
400006, 40007, 41270, 41105	C847	Anaplastic large cell lymphoma, ALK-negative	Cancer register and Hospital inpatient
400006, 40007, 41270, 41106	C848	Cutaneous T-cell lymphoma, unspecified	Cancer register and Hospital inpatient
400006, 40007, 41270, 41107	C849	Mature T/NK-cell lymphoma, unspecified	Cancer register and Hospital inpatient
400006, 40007, 41270, 41108	C85	Other and unspecified types of non-Hodgkin's lymphoma	Cancer register and Hospital inpatient
400006, 40007, 41270, 41109	C850	Lymphosarcoma	Cancer register and Hospital inpatient
400006, 40007, 41270, 41110	C851	B-cell lymphoma, unspecified	Cancer register and Hospital inpatient
400006, 40007, 41270, 41111	C852	Mediastinal (thymic) large B-cell lymphoma	Cancer register and Hospital inpatient
400006, 40007, 41270, 41112	C857	Other specified types of non-Hodgkin's lymphoma	Cancer register and Hospital inpatient
400006, 40007, 41270, 41113	C859	Non-Hodgkin's lymphoma, unspecified type	Cancer register and Hospital inpatient
400006, 40007, 41270, 41114	C86	Other specified types of T/NK-cell lymphoma	Cancer register and Hospital inpatient
400006, 40007, 41270, 41115	C860	Extranodal NK/T-cell lymphoma, nasal type	Cancer register and Hospital inpatient
400006, 40007, 41270, 41116	C861	Hepatosplenic T-cell lymphoma	Cancer register and Hospital inpatient
400006, 40007, 41270, 41117	C862	Enteropathy-type (intestinal) T-cell lymphoma	Cancer register and Hospital inpatient
400006, 40007, 41270, 41118	C863	Subcutaneous panniculitis-like T-cell lymphoma	Cancer register and Hospital inpatient
400006, 40007, 41270, 41119	C864	Blastic NK-cell lymphoma	Cancer register and Hospital inpatient
400006, 40007, 41270, 41120	C865	Angioimmunoblastic T-cell lymphoma	Cancer register and Hospital inpatient
400006, 40007, 41270, 41121	C866	Primary cutaneous CD30-positive T-cell proliferations	Cancer register and Hospital inpatient
400006, 40007, 41270, 41122	C88	Malignant immunoproliferative diseases	Cancer register and Hospital inpatient
400006, 40007, 41270, 41123	C880	Waldenstrom's macroglobulinaemia	Cancer register and Hospital inpatient
400006, 40007, 41270, 41124	C881	Alpha heavy chain disease	Cancer register and Hospital inpatient
400006, 40007, 41270, 41125	C882	Gamma heavy chain disease	Cancer register and Hospital inpatient
400006, 40007, 41270, 41126	C883	Immunoproliferative small intestinal disease	Cancer register and Hospital inpatient
400006, 40007, 41270, 41127	C884	Extranodal marginal zone B-cell lymphoma of mucosa-associated lymphoid tissue [MALT-lymphoma]	Cancer register and Hospital inpatient
400006, 40007, 41270, 41128	C887	Other malignant immunoproliferative diseases	Cancer register and Hospital inpatient
400006, 40007, 41270, 41129	C889	Malignant immunoproliferative disease, unspecified	Cancer register and Hospital inpatient
400006, 40007, 41270, 41130	C90	Multiple myeloma and malignant plasma cell neoplasms	Cancer register and Hospital inpatient
400006, 40007, 41270, 41131	C900	Multiple myeloma	Cancer register and Hospital inpatient
400006, 40007, 41270, 41132	C901	Plasma cell leukaemia	Cancer register and Hospital inpatient
400006, 40007, 41270, 41133	C902	Plasmacytoma, extramedullary	Cancer register and Hospital inpatient
400006, 40007, 41270, 41134	C903	Solitary plasmacytoma	Cancer register and Hospital inpatient
400006, 40007, 41270, 41135	C91	Lymphoid leukaemia	Cancer register and Hospital inpatient
400006, 40007, 41270, 41136	C910	Acute lymphoblastic leukaemia	Cancer register and Hospital inpatient
400006, 40007, 41270, 41137	C911	Chronic lymphocytic leukaemia	Cancer register and Hospital inpatient
400006, 40007, 41270, 41138	C912	Subacute lymphocytic leukaemia	Cancer register and Hospital inpatient
400006, 40007, 41270, 41139	C913	Prolymphocytic leukaemia	Cancer register and Hospital inpatient
400006, 40007, 41270, 41140	C914	Hairy-cell leukaemia	Cancer register and Hospital inpatient
400006, 40007, 41270, 41141	C915	Adult T-cell leukaemia	Cancer register and Hospital inpatient
400006, 40007, 41270, 41142	C916	Prolymphocytic leukaemia of T-cell type	Cancer register and Hospital inpatient
400006, 40007, 41270, 41143	C917	Other lymphoid leukaemia	Cancer register and Hospital inpatient
400006, 40007, 41270, 41144	C918	Mature B-cell leukaemia Burkitt-type	Cancer register and Hospital inpatient
400006, 40007, 41270, 41145	C919	Lymphoid leukaemia, unspecified	Cancer register and Hospital inpatient
400006, 40007, 41270, 41146	C92	Myeloid leukaemia	Cancer register and Hospital inpatient
400006, 40007, 41270, 41147	C920	Acute myeloid leukaemia	Cancer register and Hospital inpatient
400006, 40007, 41270, 41148	C921	Chronic myeloid leukaemia	Cancer register and Hospital inpatient
400006, 40007, 41270, 41149	C922	Subacute myeloid leukaemia	Cancer register and Hospital inpatient
400006, 40007, 41270, 41150	C923	Myeloid sarcoma	Cancer register and Hospital inpatient
400006, 40007, 41270, 41151	C924	Acute promyelocytic leukaemia	Cancer register and Hospital inpatient
400006, 40007, 41270, 41152	C925	Acute myelomonocytic leukaemia	Cancer register and Hospital inpatient
400006, 40007, 41270, 41153	C926	Acute myeloid leukaemia with 11q23-abnormality	Cancer register and Hospital inpatient
400006, 40007, 41270, 41154	C927	Other myeloid leukaemia	Cancer register and Hospital inpatient
400006, 40007, 41270, 41155	C928	Acute myeloid leukaemia with multilineage dysplasia	Cancer register and Hospital inpatient
400006, 40007, 41270, 41156	C929	Myeloid leukaemia, unspecified	Cancer register and Hospital inpatient
400006, 40007, 41270, 41157	C93	Monocytic leukaemia	Cancer register and Hospital inpatient
400006, 40007, 41270, 41158	C930	Acute monocytic leukaemia	Cancer register and Hospital inpatient
400006, 40007, 41270, 41159	C931	Chronic monocytic leukaemia	Cancer register and Hospital inpatient
400006, 40007, 41270, 41160	C932	Subacute monocytic leukaemia	Cancer register and Hospital inpatient
400006, 40007, 41270, 41161	C933	Juvenile myelomonocytic leukaemia	Cancer register and Hospital inpatient
400006, 40007, 41270, 41162	C937	Other monocytic leukaemia	Cancer register and Hospital inpatient
400006, 40007, 41270, 41163	C939	Monocytic leukaemia, unspecified	Cancer register and Hospital inpatient
400006, 40007, 41270, 41164	C94	Other leukaemias of specified cell type	Cancer register and Hospital inpatient
400006, 40007, 41270, 41165	C940	Acute erythraemia and erythroleukaemia	Cancer register and Hospital inpatient
400006, 40007, 41270, 41166	C941	Chronic erythraemia	Cancer register and Hospital inpatient
400006, 40007, 41270, 41167	C942	Acute megakaryoblastic leukaemia	Cancer register and Hospital inpatient
400006, 40007, 41270, 41168	C943	Mast cell leukaemia	Cancer register and Hospital inpatient
400006, 40007, 41270, 41169	C944	Acute panmyelosis	Cancer register and Hospital inpatient
400006, 40007, 41270, 41170	C945	Acute myelofibrosis	Cancer register and Hospital inpatient
400006, 40007, 41270, 41171	C946	Myelodysplastic and myeloproliferative disease, not elsewhere classified	Cancer register and Hospital inpatient
400006, 40007, 41270, 41172	C947	Other specified leukaemias	Cancer register and Hospital inpatient
400006, 40007, 41270, 41173	C95	Leukaemia of unspecified cell type	Cancer register and Hospital inpatient
400006, 40007, 41270, 41174	C950	Acute leukaemia of unspecified cell type	Cancer register and Hospital inpatient
400006, 40007, 41270, 41175	C951	Chronic leukaemia of unspecified cell type	Cancer register and Hospital inpatient
400006, 40007, 41270, 41176	C952	Subacute leukaemia of unspecified cell type	Cancer register and Hospital inpatient
400006, 40007, 41270, 41177	C957	Other leukaemia of unspecified cell type	Cancer register and Hospital inpatient
400006, 40007, 41270, 41178	C959	Leukaemia, unspecified	Cancer register and Hospital inpatient
400006, 40007, 41270, 41179	C96	Other and unspecified malignant neoplasms of lymphoid, haematopoietic and related tissue	Cancer register and Hospital inpatient
400006, 40007, 41270, 41180	C960	Letterer-Siwe disease	Cancer register and Hospital inpatient
400006, 40007, 41270, 41181	C961	Malignant histiocytosis	Cancer register and Hospital inpatient
400006, 40007, 41270, 41182	C962	Malignant mast cell tumour	Cancer register and Hospital inpatient
400006, 40007, 41270, 41183	C963	True histiocytic lymphoma	Cancer register and Hospital inpatient
400006, 40007, 41270, 41184	C964	Sarcoma of dendritic cells (accessory cells)	Cancer register and Hospital inpatient
400006, 40007, 41270, 41185	C965	Multifocal and unisystemic Langerhans-cell histiocytosis	Cancer register and Hospital inpatient
400006, 40007, 41270, 41186	C966	Unifocal Langerhans-cell histiocytosis	Cancer register and Hospital inpatient
400006, 40007, 41270, 41187	C967	Other specified malignant neoplasms of lymphoid, haematopoietic and related tissue	Cancer register and Hospital inpatient
400006, 40007, 41270, 41188	C968	Histiocytic sarcoma	Cancer register and Hospital inpatient
400006, 40007, 41270, 41189	C969	Malignant neoplasms of lymphoid, haematopoietic and related tissue, unspecified	Cancer register and Hospital inpatient
400006, 40007, 41270, 41190	C97	Malignant neoplasms of independent (primary) multiple sites	Cancer register and Hospital inpatient
400006, 40007, 41270, 41191	D37	Neoplasm of uncertain or unknown behaviour of oral cavity and digestive organs	Cancer register and Hospital inpatient
400006, 40007, 41270, 41192	D370	Lip, oral cavity and pharynx	Cancer register and Hospital inpatient
400006, 40007, 41270, 41193	D371	Stomach	Cancer register and Hospital inpatient
400006, 40007, 41270, 41194	D372	Small intestine	Cancer register and Hospital inpatient
400006, 40007, 41270, 41195	D373	Appendix	Cancer register and Hospital inpatient
400006, 40007, 41270, 41196	D374	Colon	Cancer register and Hospital inpatient
400006, 40007, 41270, 41197	D375	Rectum	Cancer register and Hospital inpatient
400006, 40007, 41270, 41198	D376	Liver, gallbladder and bile ducts	Cancer register and Hospital inpatient
400006, 40007, 41270, 41199	D377	Other digestive organs	Cancer register and Hospital inpatient
400006, 40007, 41270, 41200	D379	Digestive organ, unspecified	Cancer register and Hospital inpatient
400006, 40007, 41270, 41201	D38	Neoplasm of uncertain or unknown behaviour of middle ear and respiratory and intrathoracic organs	Cancer register and Hospital inpatient
400006, 40007, 41270, 41202	D380	Larynx	Cancer register and Hospital inpatient
400006, 40007, 41270, 41203	D381	Trachea, bronchus and lung	Cancer register and Hospital inpatient
400006, 40007, 41270, 41204	D382	Pleura	Cancer register and Hospital inpatient
400006, 40007, 41270, 41205	D383	Mediastinum	Cancer register and Hospital inpatient
400006, 40007, 41270, 41206	D384	Thymus	Cancer register and Hospital inpatient
400006, 40007, 41270, 41207	D385	Other respiratory organs	Cancer register and Hospital inpatient
400006, 40007, 41270, 41208	D386	Respiratory organ, unspecified	Cancer register and Hospital inpatient
400006, 40007, 41270, 41209	D39	Neoplasm of uncertain or unknown behaviour of female genital organs	Cancer register and Hospital inpatient
400006, 40007, 41270, 41210	D390	Uterus	Cancer register and Hospital inpatient
400006, 40007, 41270, 41211	D391	Ovary	Cancer register and Hospital inpatient
400006, 40007, 41270, 41212	D392	Placenta	Cancer register and Hospital inpatient
400006, 40007, 41270, 41213	D397	Other female genital organs	Cancer register and Hospital inpatient
400006, 40007, 41270, 41214	D399	Female genital organ, unspecified	Cancer register and Hospital inpatient
400006, 40007, 41270, 41215	D40	Neoplasm of uncertain or unknown behaviour of male genital organs	Cancer register and Hospital inpatient
400006, 40007, 41270, 41216	D400	Prostate	Cancer register and Hospital inpatient
400006, 40007, 41270, 41217	D401	Testis	Cancer register and Hospital inpatient
400006, 40007, 41270, 41218	D407	Other male genital organs	Cancer register and Hospital inpatient
400006, 40007, 41270, 41219	D409	Male genital organ, unspecified	Cancer register and Hospital inpatient
400006, 40007, 41270, 41220	D41	Neoplasm of uncertain or unknown behaviour of urinary organs	Cancer register and Hospital inpatient
400006, 40007, 41270, 41221	D410	Kidney	Cancer register and Hospital inpatient
400006, 40007, 41270, 41222	D411	Renal pelvis	Cancer register and Hospital inpatient
400006, 40007, 41270, 41223	D412	Ureter	Cancer register and Hospital inpatient
400006, 40007, 41270, 41224	D413	Urethra	Cancer register and Hospital inpatient
400006, 40007, 41270, 41225	D414	Bladder	Cancer register and Hospital inpatient
400006, 40007, 41270, 41226	D417	Other urinary organs	Cancer register and Hospital inpatient
400006, 40007, 41270, 41227	D419	Urinary organ, unspecified	Cancer register and Hospital inpatient
400006, 40007, 41270, 41228	D42	Neoplasm of uncertain or unknown behaviour of meninges	Cancer register and Hospital inpatient
400006, 40007, 41270, 41229	D420	Cerebral meninges	Cancer register and Hospital inpatient
400006, 40007, 41270, 41230	D421	Spinal meninges	Cancer register and Hospital inpatient
400006, 40007, 41270, 41231	D429	Meninges, unspecified	Cancer register and Hospital inpatient
400006, 40007, 41270, 41232	D43	Neoplasm of uncertain or unknown behaviour of brain and central nervous system	Cancer register and Hospital inpatient
400006, 40007, 41270, 41233	D430	Brain, supratentorial	Cancer register and Hospital inpatient
400006, 40007, 41270, 41234	D431	Brain, infratentorial	Cancer register and Hospital inpatient
400006, 40007, 41270, 41235	D432	Brain, unspecified	Cancer register and Hospital inpatient
400006, 40007, 41270, 41236	D433	Cranial nerves	Cancer register and Hospital inpatient
400006, 40007, 41270, 41237	D434	Spinal cord	Cancer register and Hospital inpatient
400006, 40007, 41270, 41238	D437	Other parts of central nervous system	Cancer register and Hospital inpatient
400006, 40007, 41270, 41239	D439	Central nervous system, unspecified	Cancer register and Hospital inpatient
400006, 40007, 41270, 41240	D44	Neoplasm of uncertain or unknown behaviour of endocrine glands	Cancer register and Hospital inpatient
400006, 40007, 41270, 41241	D440	Thyroid gland	Cancer register and Hospital inpatient
400006, 40007, 41270, 41242	D441	Adrenal gland	Cancer register and Hospital inpatient
400006, 40007, 41270, 41243	D442	Parathyroid gland	Cancer register and Hospital inpatient
400006, 40007, 41270, 41244	D443	Pituitary gland	Cancer register and Hospital inpatient
400006, 40007, 41270, 41245	D444	Craniopharyngeal duct	Cancer register and Hospital inpatient
400006, 40007, 41270, 41246	D445	Pineal gland	Cancer register and Hospital inpatient
400006, 40007, 41270, 41247	D446	Carotid body	Cancer register and Hospital inpatient
400006, 40007, 41270, 41248	D447	Aortic body and other paraganglia	Cancer register and Hospital inpatient
400006, 40007, 41270, 41249	D448	Pluriglandular involvement	Cancer register and Hospital inpatient
400006, 40007, 41270, 41250	D449	Endocrine gland, unspecified	Cancer register and Hospital inpatient
400006, 40007, 41270, 41251	D45	Polycythaemia vera	Cancer register and Hospital inpatient
400006, 40007, 41270, 41252	D46	Myelodysplastic syndromes	Cancer register and Hospital inpatient
400006, 40007, 41270, 41253	D460	Refractory anaemia without sideroblasts, so stated	Cancer register and Hospital inpatient
400006, 40007, 41270, 41254	D461	Refractory anaemia with sideroblasts	Cancer register and Hospital inpatient
400006, 40007, 41270, 41255	D462	Refractory anaemia with excess of blasts	Cancer register and Hospital inpatient
400006, 40007, 41270, 41256	D463	Refractory anaemia with excess of blasts with transformation	Cancer register and Hospital inpatient
400006, 40007, 41270, 41257	D464	Refractory anaemia, unspecified	Cancer register and Hospital inpatient
400006, 40007, 41270, 41258	D465	Refractory anaemia with multi-lineage dysplasia	Cancer register and Hospital inpatient
400006, 40007, 41270, 41259	D466	Myelodysplastic syndrome with isolated del(5q) chromosomal abnormality	Cancer register and Hospital inpatient
400006, 40007, 41270, 41260	D467	Other myelodysplastic syndromes	Cancer register and Hospital inpatient
400006, 40007, 41270, 41261	D469	Myelodysplastic syndrome, unspecified	Cancer register and Hospital inpatient
400006, 40007, 41270, 41262	D47	Other neoplasms of uncertain or unknown behaviour of lymphoid, haematopoietic and related tissue	Cancer register and Hospital inpatient
400006, 40007, 41270, 41263	D470	Histiocytic and mast cell tumours of uncertain and unknown behaviour	Cancer register and Hospital inpatient
400006, 40007, 41270, 41264	D471	Chronic myeloproliferative disease	Cancer register and Hospital inpatient
400006, 40007, 41270, 41265	D472	Monoclonal gammopathy	Cancer register and Hospital inpatient
400006, 40007, 41270, 41266	D473	Essential (haemorrhagic) thrombocythaemia	Cancer register and Hospital inpatient
400006, 40007, 41270, 41267	D474	Osteomyelofibrosis	Cancer register and Hospital inpatient
400006, 40007, 41270, 41268	D475	Chronic eosinophilic leukaemia [hypereosinophilic syndrome]	Cancer register and Hospital inpatient
400006, 40007, 41270, 41269	D477	Other specified neoplasms of uncertain or unknown behaviour of lymphoid, haematopoietic and related tissue	Cancer register and Hospital inpatient
400006, 40007, 41270, 41270	D479	Neoplasm of uncertain or unknown behaviour of lymphoid, haematopoietic and related tissue, unspecified	Cancer register and Hospital inpatient
400006, 40007, 41270, 41271	D48	Neoplasm of uncertain or unknown behaviour of other and unspecified sites	Cancer register and Hospital inpatient
400006, 40007, 41270, 41272	D480	Bone and articular cartilage	Cancer register and Hospital inpatient
400006, 40007, 41270, 41273	D481	Connective and other soft tissue	Cancer register and Hospital inpatient
400006, 40007, 41270, 41274	D482	Peripheral nerves and autonomic nervous system	Cancer register and Hospital inpatient
400006, 40007, 41270, 41275	D483	Retroperitoneum	Cancer register and Hospital inpatient
400006, 40007, 41270, 41276	D484	Peritoneum	Cancer register and Hospital inpatient
400006, 40007, 41270, 41277	D485	Skin	Cancer register and Hospital inpatient
400006, 40007, 41270, 41278	D486	Breast	Cancer register and Hospital inpatient
400006, 40007, 41270, 41279	D487	Other specified sites	Cancer register and Hospital inpatient
400006, 40007, 41270, 41280	D489	Neoplasms of uncertain or unknown behaviour, unspecified	Cancer register and Hospital inpatient
20006 and 20007		Interpolated Year when cancer first diagnosed Or Interpolated Age of participant when cancer first diagnosed	Self-reported
Pancreatic Disease
400006, 40007, 41270, 41236	C25	Malignant neoplasm of pancreas	Cancer register and Hospital inpatient	Distribution of the subclasses of pancreatic disease based on first ICD-10 code occurrence
400006, 40007, 41270, 41237	C250	Head of pancreas	Cancer register and Hospital inpatient
400006, 40007, 41270, 41238	C251	Body of pancreas	Cancer register and Hospital inpatient
400006, 40007, 41270, 41239	C252	Tail of pancreas	Cancer register and Hospital inpatient
400006, 40007, 41270, 41240	C253	Pancreatic duct	Cancer register and Hospital inpatient
400006, 40007, 41270, 41241	C254	Endocrine pancreas	Cancer register and Hospital inpatient
400006, 40007, 41270, 41242	C257	Other parts of pancreas	Cancer register and Hospital inpatient
400006, 40007, 41270, 41243	C258	Overlapping lesion of pancreas	Cancer register and Hospital inpatient
400006, 40007, 41270, 41244	C259	Pancreas, unspecified	Cancer register and Hospital inpatient
400006, 40007, 41270, 41245	E11	Non-insulin-dependent diabetes mellitus	Cancer register and Hospital inpatient
400006, 40007, 41270, 41246	E110	With coma	Cancer register and Hospital inpatient
400006, 40007, 41270, 41247	E111	With ketoacidosis	Cancer register and Hospital inpatient
400006, 40007, 41270, 41248	E112	With renal complications	Cancer register and Hospital inpatient
400006, 40007, 41270, 41249	E113	With ophthalmic complications	Cancer register and Hospital inpatient
400006, 40007, 41270, 41250	E114	With neurological complications	Cancer register and Hospital inpatient
400006, 40007, 41270, 41251	E115	With peripheral circulatory complications	Cancer register and Hospital inpatient
400006, 40007, 41270, 41252	E116	With other specified complications	Cancer register and Hospital inpatient
400006, 40007, 41270, 41253	E117	With multiple complications	Cancer register and Hospital inpatient
400006, 40007, 41270, 41254	E118	With unspecified complications	Cancer register and Hospital inpatient
400006, 40007, 41270, 41255	E119	Without complications	Cancer register and Hospital inpatient
400006, 40007, 41270, 41256	E13	Other specified diabetes mellitus	Cancer register and Hospital inpatient
400006, 40007, 41270, 41257	E130	With coma	Cancer register and Hospital inpatient
400006, 40007, 41270, 41258	E131	With ketoacidosis	Cancer register and Hospital inpatient
400006, 40007, 41270, 41259	E132	With renal complications	Cancer register and Hospital inpatient
400006, 40007, 41270, 41260	E133	With ophthalmic complications	Cancer register and Hospital inpatient
400006, 40007, 41270, 41261	E134	With neurological complications	Cancer register and Hospital inpatient
400006, 40007, 41270, 41262	E135	With peripheral circulatory complications	Cancer register and Hospital inpatient
400006, 40007, 41270, 41263	E136	With other specified complications	Cancer register and Hospital inpatient
400006, 40007, 41270, 41264	E137	With multiple complications	Cancer register and Hospital inpatient
400006, 40007, 41270, 41265	E138	With unspecified complications	Cancer register and Hospital inpatient
400006, 40007, 41270, 41266	E139	Without complications	Cancer register and Hospital inpatient
400006, 40007, 41270, 41267	K85	Acute pancreatitis	Cancer register and Hospital inpatient
400006, 40007, 41270, 41268	K	Idiopathic acute pancreatitis	Cancer register and Hospital inpatient
400006, 40007, 41270, 41269	K851	Biliary acute pancreatitis	Cancer register and Hospital inpatient
400006, 40007, 41270, 41270	K852	Alcohol-induced acute pancreatitis	Cancer register and Hospital inpatient
400006, 40007, 41270, 41271	K853	Drug-induced acute pancreatitis	Cancer register and Hospital inpatient
400006, 40007, 41270, 41272	K858	Other acute pancreatitis	Cancer register and Hospital inpatient
400006, 40007, 41270, 41273	K859	Acute pancreatitis, unspecified	Cancer register and Hospital inpatient
400006, 40007, 41270, 41274	K86	Other diseases of pancreas	Cancer register and Hospital inpatient
400006, 40007, 41270, 41275	K860	Alcohol-induced chronic pancreatitis	Cancer register and Hospital inpatient
400006, 40007, 41270, 41276	K861	Other chronic pancreatitis	Cancer register and Hospital inpatient
400006, 40007, 41270, 41277	K862	Cyst of pancreas	Cancer register and Hospital inpatient
400006, 40007, 41270, 41278	K863	Pseudocyst of pancreas	Cancer register and Hospital inpatient
400006, 40007, 41270, 41279	K868	Other specified diseases of pancreas	Cancer register and Hospital inpatient
400006, 40007, 41270, 41280	K869	Disease of pancreas, unspecified	Cancer register and Hospital inpatient
20006 and 20007		Interpolated Year when cancer first diagnosed Or Interpolated Age of participant when cancer first diagnosed	Self-reported
Liver Disease
400006, 40005, 41270, 41280	C22	Malignant neoplasm of liver and intrahepatic bile ducts	Cancer register and Hospital inpatient	Distribution of the subclasses of liver disease based on first ICD-10 code occurrence
400006, 40005, 41270, 41281	C220	Liver cell carcinoma	Cancer register and Hospital inpatient
400006, 40005, 41270, 41282	C221	Intrahepatic bile duct carcinoma	Cancer register and Hospital inpatient
400006, 40005, 41270, 41283	C222	Hepatoblastoma	Cancer register and Hospital inpatient
400006, 40005, 41270, 41284	C223	Angiosarcoma of liver	Cancer register and Hospital inpatient
400006, 40005, 41270, 41285	C224	Other sarcomas of liver	Cancer register and Hospital inpatient
400006, 40005, 41270, 41286	C227	Other specified carcinomas of liver	Cancer register and Hospital inpatient
400006, 40005, 41270, 41287	C229	Liver, unspecified	Cancer register and Hospital inpatient
400006, 40005, 41270, 41288	B18	Chronic viral hepatitis	Cancer register and Hospital inpatient
400006, 40005, 41270, 41289	B180	Chronic viral hepatitis B with delta-agent	Cancer register and Hospital inpatient
400006, 40005, 41270, 41290	B1800	Chronic viral hepatitis B with delta-agent: immune-tolerant phase	Cancer register and Hospital inpatient
400006, 40005, 41270, 41291	B1809	Chronic viral hepatitis B with delta-agent: other and unspecified phase	Cancer register and Hospital inpatient
400006, 40005, 41270, 41292	B181	Chronic viral hepatitis B without delta-agent	Cancer register and Hospital inpatient
400006, 40005, 41270, 41293	B1810	Chronic viral hepatitis B without delta-agent: immune-tolerant phase	Cancer register and Hospital inpatient
400006, 40005, 41270, 41294	B1819	Chronic viral hepatitis B without delta-agent: other and unspecified phase	Cancer register and Hospital inpatient
400006, 40005, 41270, 41295	B182	Chronic viral hepatitis C	Cancer register and Hospital inpatient
400006, 40005, 41270, 41296	B188	Other chronic viral hepatitis	Cancer register and Hospital inpatient
400006, 40005, 41270, 41297	B189	Chronic viral hepatitis, unspecified	Cancer register and Hospital inpatient
400006, 40005, 41270, 41298	I85	Oesophageal varices	Cancer register and Hospital inpatient
400006, 40005, 41270, 41299	I850	Oesophageal varices with bleeding	Cancer register and Hospital inpatient
400006, 40005, 41270, 41300	I859	Oesophageal varices without bleeding	Cancer register and Hospital inpatient
400006, 40005, 41270, 41301	I864	Gastric varices	Cancer register and Hospital inpatient
400006, 40005, 41270, 41302	I982	Oesophageal varices in diseases classified elsewhere	Cancer register and Hospital inpatient
400006, 40005, 41270, 41303	K70	Alcoholic liver disease	Cancer register and Hospital inpatient
400006, 40005, 41270, 41304	K700	Alcoholic fatty liver	Cancer register and Hospital inpatient
400006, 40005, 41270, 41305	K701	Alcoholic hepatitis	Cancer register and Hospital inpatient
400006, 40005, 41270, 41306	K702	Alcoholic fibrosis and sclerosis of liver	Cancer register and Hospital inpatient
400006, 40005, 41270, 41307	K703	Alcoholic cirrhosis of liver	Cancer register and Hospital inpatient
400006, 40005, 41270, 41308	K704	Alcoholic hepatic failure	Cancer register and Hospital inpatient
400006, 40005, 41270, 41309	K709	Alcoholic liver disease, unspecified	Cancer register and Hospital inpatient
400006, 40005, 41270, 41310	K711	Toxic liver disease with hepatic necrosis	Cancer register and Hospital inpatient
400006, 40005, 41270, 41311	K713	Toxic liver disease with chronic persistent hepatitis	Cancer register and Hospital inpatient
400006, 40005, 41270, 41312	K714	Toxic liver disease with chronic lobular hepatitis	Cancer register and Hospital inpatient
400006, 40005, 41270, 41313	K715	Toxic liver disease with chronic active hepatitis	Cancer register and Hospital inpatient
400006, 40005, 41270, 41314	K717	Toxic liver disease with fibrosis and cirrhosis of liver	Cancer register and Hospital inpatient
400006, 40005, 41270, 41315	K72	Hepatic failure, not elsewhere classified	Cancer register and Hospital inpatient
400006, 40005, 41270, 41316	K720	Acute and subacute hepatic failure	Cancer register and Hospital inpatient
400006, 40005, 41270, 41317	K721	Chronic hepatic failure	Cancer register and Hospital inpatient
400006, 40005, 41270, 41318	K729	Hepatic failure, unspecified	Cancer register and Hospital inpatient
400006, 40005, 41270, 41319	K73	Chronic hepatitis, not elsewhere classified	Cancer register and Hospital inpatient
400006, 40005, 41270, 41320	K730	Chronic persistent hepatitis, not elsewhere classified	Cancer register and Hospital inpatient
400006, 40005, 41270, 41321	K731	Chronic lobular hepatitis, not elsewhere classified	Cancer register and Hospital inpatient
400006, 40005, 41270, 41322	K732	Chronic active hepatitis, not elsewhere classified	Cancer register and Hospital inpatient
400006, 40005, 41270, 41323	K738	Other chronic hepatitis, not elsewhere classified	Cancer register and Hospital inpatient
400006, 40005, 41270, 41324	K739	Chronic hepatitis, unspecified	Cancer register and Hospital inpatient
400006, 40005, 41270, 41325	K74	Fibrosis and cirrhosis of liver	Cancer register and Hospital inpatient
400006, 40005, 41270, 41326	K740	Hepatic fibrosis	Cancer register and Hospital inpatient
400006, 40005, 41270, 41327	K741	Hepatic sclerosis	Cancer register and Hospital inpatient
400006, 40005, 41270, 41328	K742	Hepatic fibrosis with hepatic sclerosis	Cancer register and Hospital inpatient
400006, 40005, 41270, 41329	K743	Primary biliary cirrhosis	Cancer register and Hospital inpatient
400006, 40005, 41270, 41330	K744	Secondary biliary cirrhosis	Cancer register and Hospital inpatient
400006, 40005, 41270, 41331	K745	Biliary cirrhosis, unspecified	Cancer register and Hospital inpatient
400006, 40005, 41270, 41332	K746	Other and unspecified cirrhosis of liver	Cancer register and Hospital inpatient
400006, 40005, 41270, 41333	K760	Fatty (change of) liver, not elsewhere classified	Cancer register and Hospital inpatient
400006, 40005, 41270, 41334	K762	Central haemorrhagic necrosis of liver	Cancer register and Hospital inpatient
400006, 40005, 41270, 41335	K763	Infarction of liver	Cancer register and Hospital inpatient
400006, 40005, 41270, 41336	K764	Peliosis hepatis	Cancer register and Hospital inpatient
400006, 40005, 41270, 41337	K765	Hepatic veno-occlusive disease	Cancer register and Hospital inpatient
400006, 40005, 41270, 41338	K766	Portal hypertension	Cancer register and Hospital inpatient
400006, 40005, 41270, 41339	K767	Hepatorenal syndrome	Cancer register and Hospital inpatient
400006, 40005, 41270, 41340	K768	Other specified diseases of liver	Cancer register and Hospital inpatient
400006, 40005, 41270, 41341	K769	Liver disease, unspecified	Cancer register and Hospital inpatient
20006 AND 20007		Interpolated Year when cancer first diagnosed Or Interpolated Age of participant when cancer first diagnosed	Self-reported
Osteoarthritis
41270 and 41280	M15	Polyarthrosis	Hospital inpatient	No subclasses for distribution plot.
41271 and 41280	M150	Primary generalised (osteo)arthrosis	Hospital inpatient
41272 and 41280	M1500	Primary generalized (osteo)arthrosis, Multiple sites	Hospital inpatient
41273 and 41280	M151	Heberden's nodes (with arthropathy)	Hospital inpatient
41274 and 41280	M152	Bouchard's nodes (with arthropathy)	Hospital inpatient
41275 and 41280	M153	Secondary multiple arthrosis	Hospital inpatient
41276 and 41280	M154	Erosive (osteo)arthrosis	Hospital inpatient
41277 and 41280	M158	Other polyarthrosis	Hospital inpatient
41278 and 41280	M159	Polyarthrosis, unspecified	Hospital inpatient
41279 and 41280	M1599	Polyosteoarthritis, unspecified	Hospital inpatient
41280 and 41280	M16	Coxarthrosis [arthrosis of hip]	Hospital inpatient
41281 and 41280	M160	Primary coxarthrosis, bilateral	Hospital inpatient
41282 and 41280	M161	Other primary coxarthrosis	Hospital inpatient
41283 and 41280	M162	Coxarthrosis resulting from dysplasia, bilateral	Hospital inpatient
41284 and 41280	M163	Other dysplastic coxarthrosis	Hospital inpatient
41285 and 41280	M164	Posttraumatic coxarthrosis, bilateral	Hospital inpatient
41286 and 41280	M165	Other posttraumatic coxarthrosis	Hospital inpatient
41287 and 41280	M166	Other secondary coxarthrosis, bilateral	Hospital inpatient
41288 and 41280	M167	Other secondary coxarthrosis	Hospital inpatient
41289 and 41280	M169	Coxarthrosis, unspecified	Hospital inpatient
41290 and 41280	M17	Gonarthrosis [arthrosis of knee]	Hospital inpatient
41291 and 41280	M170	Primary gonarthrosis, bilateral	Hospital inpatient
41292 and 41280	M171	Other primary gonarthrosis	Hospital inpatient
41293 and 41280	M172	Posttraumatic gonarthrosis, bilateral	Hospital inpatient
41294 and 41280	M173	Other posttraumatic gonarthrosis	Hospital inpatient
41295 and 41280	M174	Other secondary gonarthrosis, bilateral	Hospital inpatient
41296 and 41280	M175	Other secondary gonarthrosis	Hospital inpatient
41297 and 41280	M179	Gonarthrosis, unspecified	Hospital inpatient
41298 and 41280	M18	Arthrosis of first carpometacarpal joint	Hospital inpatient
41299 and 41280	M180	Primary arthrosis of first carpometacarpal joints, bilateral	Hospital inpatient
41300 and 41280	M181	Other primary arthrosis of first carpometacarpal joint	Hospital inpatient
41301 and 41280	M182	Posttraumatic arthrosis of first carpometacarpal joints, bilateral	Hospital inpatient
41302 and 41280	M183	Other posttraumatic arthrosis of first carpometacarpal joint	Hospital inpatient
41303 and 41280	M184	Other secondary arthrosis of first carpometacarpal joints, bilateral	Hospital inpatient
41304 and 41280	M185	Other secondary arthrosis of first carpometacarpal joint	Hospital inpatient
41305 and 41280	M189	Arthrosis of first carpometacarpal joint, unspecified	Hospital inpatient
41306 and 41280	M19	Other arthrosis	Hospital inpatient
41307 and 41280	M190	Primary arthrosis of other joints	Hospital inpatient
41308 and 41280	M1900	Primary arthrosis of other joints (Multiple sites)	Hospital inpatient
41309 and 41280	M1901	Primary arthrosis of other joints (Shoulder region)	Hospital inpatient
41310 and 41280	M1902	Primary arthrosis of other joints (Upper arm)	Hospital inpatient
41311 and 41280	M1903	Primary arthrosis of other joints (Forearm)	Hospital inpatient
41312 and 41280	M1904	Primary arthrosis of other joints (Hand)	Hospital inpatient
41313 and 41280	M1905	Primary arthrosis of other joints (Pelvic region and thigh)	Hospital inpatient
41314 and 41280	M1906	Primary arthrosis of other joints-Lower leg	Hospital inpatient
41315 and 41280	M1907	Primary arthrosis of other joints (Ankle and foot)	Hospital inpatient
41316 and 41280	M1908	Primary arthrosis of other joints (Other)	Hospital inpatient
41317 and 41280	M1909	Primary arthrosis of other joints (Site unspecified)	Hospital inpatient
41318 and 41280	M191	Posttraumatic arthrosis of other joints	Hospital inpatient
41319 and 41280	M1910	Post-traumatic arthrosis of other joints (Multiple sites)	Hospital inpatient
41320 and 41280	M1911	Post-traumatic arthrosis of other joints (Shoulder region)	Hospital inpatient
41321 and 41280	M1912	Post-traumatic arthrosis of other joints (Upper arm)	Hospital inpatient
41322 and 41280	M1913	Post-traumatic arthrosis of other joints (Forearm)	Hospital inpatient
41323 and 41280	M1914	Post-traumatic arthrosis of other joints (Hand)	Hospital inpatient
41324 and 41280	M1915	Post-traumatic arthrosis of other joints (Pelvic region and thigh)	Hospital inpatient
41325 and 41280	M1916	Post-traumatic arthrosis of other joints-Lower leg	Hospital inpatient
41326 and 41280	M1917	Post-traumatic arthrosis of other joints (Ankle and foot)	Hospital inpatient
41327 and 41280	M1918	Post-traumatic arthrosis of other joints (Other)	Hospital inpatient
41328 and 41280	M1919	Post-traumatic arthrosis of other joints (Site unspecified)	Hospital inpatient
41329 and 41280	M192	Other secondary arthrosis	Hospital inpatient
41330 and 41280	M1920	Other secondary arthrosis (Multiple sites)	Hospital inpatient
41331 and 41280	M1921	Other secondary arthrosis (Shoulder region)	Hospital inpatient
41332 and 41280	M1922	Other secondary arthrosis (Upper arm)	Hospital inpatient
41333 and 41280	M1923	Other secondary arthrosis (Forearm)	Hospital inpatient
41334 and 41280	M1924	Other secondary arthrosis (Hand)	Hospital inpatient
41335 and 41280	M1925	Other secondary arthrosis (Pelvic region and thigh)	Hospital inpatient
41336 and 41280	M1926	Other secondary arthrosis of other joints-Lower leg	Hospital inpatient
41337 and 41280	M1927	Other secondary arthrosis (Ankle and foot)	Hospital inpatient
41338 and 41280	M1928	Other secondary arthrosis (Other)	Hospital inpatient
41339 and 41280	M1929	Other secondary arthrosis (Site unspecified)	Hospital inpatient
41340 and 41280	M198	Other specified arthrosis	Hospital inpatient
41341 and 41280	M1980	Other specified arthrosis (Multiple sites)	Hospital inpatient
41342 and 41280	M1981	Other specified arthrosis (Shoulder region	Hospital inpatient
41343 and 41280	M1982	Other specified arthrosis (Upper arm)	Hospital inpatient
41344 and 41280	M1983	Other specified arthrosis (Forearm)	Hospital inpatient
41345 and 41280	M1984	Other specified arthrosis (Hand)	Hospital inpatient
41346 and 41280	M1985	Other specified arthrosis (Pelvic region and thigh)	Hospital inpatient
41347 and 41280	M1986	Other specified arthrosis (Lower leg)	Hospital inpatient
41348 and 41280	M1987	Other specified arthrosis (Ankle and foot)	Hospital inpatient
41349 and 41280	M1988	Other specified arthrosis (Other)	Hospital inpatient
41350 and 41280	M1989	Other specified arthrosis (Site unspecified)	Hospital inpatient
41351 and 41280	M199	Arthrosis, unspecified	Hospital inpatient
41352 and 41280	M1990	Arthrosis, unspecified (Multiple sites)	Hospital inpatient
41353 and 41280	M1991	Arthrosis, unspecified (Shoulder region)	Hospital inpatient
41354 and 41280	M1992	Arthrosis, unspecified (Upper arm)	Hospital inpatient
41355 and 41280	M1993	Arthrosis, unspecified (Forearm)	Hospital inpatient
41356 and 41280	M1994	Arthrosis, unspecified (Hand)	Hospital inpatient
41357 and 41280	M1995	Arthrosis, unspecified (Pelvic region and thigh)	Hospital inpatient
41358 and 41280	M1996	Arthrosis, unspecified-Lower leg	Hospital inpatient
41359 and 41280	M1997	Arthrosis, unspecified (Ankle and foot)	Hospital inpatient
41360 and 41280	M1998	Arthrosis, unspecified (Other)	Hospital inpatient
41361 and 41280	M1999	Arthrosis, unspecified (Site unspecified)	Hospital inpatient
20002	1465	Osteoarthritis	Self-reported

## Sheet: Whole-body Radiomics Features
Whole-body Radiomics Features and Categories
Label	Name	Category	Normalize by height squared	Excluded	Reason
1	spleen	spleen	no	no
2	kidney_right	kidney	no	no
3	kidney_left	kidney	no	no
4	gallbladder	digestive	no	no
5	liver	liver	no	no
6	stomach	digestive	no	no
7	pancreas	pancreas	no	no
8	adrenal_gland_right	endocrine	no	no
9	adrenal_gland_left	endocrine	no	no
10	lung_upper_lobe_left	respiratory	no	no
11	lung_lower_lobe_left	respiratory	no	no
12	lung_upper_lobe_right	respiratory	no	no
13	lung_middle_lobe_right	respiratory	no	no
14	lung_lower_lobe_right	respiratory	no	no
15	esophagus	digestive	no	no
16	trachea	respiratory	no	no
17	thyroid_gland	endocrine	no	no
18	intestine	digestive	no	no
19	duodenum	digestive	no	no
20	unused	unused	no	yes	Unused label
21	urinary_bladder	urinary_bladder	no	yes	Failed image segmentation resulting in numerous missing values
22	prostate	prostate	no	yes	Sex-specific organ resulting in numerous missing values
23	sacrum	bone	no	no
24	heart	heart	no	no
25	aorta	vascular	no	no
26	pulmonary_vein	vascular	no	no
27	brachiocephalic_trunk	vascular	no	no
28	subclavian_artery_right	vascular	no	no
29	subclavian_artery_left	vascular	no	no
30	common_carotid_artery_right	vascular	no	no
31	common_carotid_artery_left	vascular	no	no
32	brachiocephalic_vein_left	vascular	no	no
33	brachiocephalic_vein_right	vascular	no	no
34	atrial_appendage_left	vascular	no	no
35	superior_vena_cava	vascular	no	no
36	inferior_vena_cava	vascular	no	no
37	portal_vein_and_splenic_vein	vascular	no	no
38	iliac_artery_left	vascular	no	no
39	iliac_artery_right	vascular	no	no
40	iliac_vena_left	vascular	no	no
41	iliac_vena_right	vascular	no	no
42	humerus_left	bone	yes	no
43	humerus_right	bone	yes	no
44	scapula_left	bone	yes	no
45	scapula_right	bone	yes	no
46	clavicula_left	bone	yes	no
47	clavicula_right	bone	yes	no
48	femur_left	bone	yes	no
49	femur_right	bone	yes	no
50	hip_left	bone	yes	no
51	hip_right	bone	yes	no
52	spinal_cord	spine	yes	no
53	gluteus_maximus_left	muscle	yes	no
54	gluteus_maximus_right	muscle	yes	no
55	gluteus_medius_left	muscle	yes	no
56	gluteus_medius_right	muscle	yes	no
57	gluteus_minimus_left	muscle	yes	no
58	gluteus_minimus_right	muscle	yes	no
59	autochthon_left	muscle	yes	no
60	autochthon_right	muscle	yes	no
61	iliopsoas_left	muscle	yes	no
62	iliopsoas_right	muscle	yes	no
63	sternum	bone	yes	no
64	costal_cartilages	bone	yes	no
65	subcutaneous_fat	fat	yes	no
66	muscle	muscle	yes	no
67	inner_fat	fat	yes	no
68	IVD	spine	yes	no
69	vertebra_body	spine	yes	no
70	vertebra_posterior_elements	spine	yes	no
71	spinal_channel	spine	yes	no
72	bone_other	bone	yes	no
